1 **A novel interplay between GEFs orchestrates Cdc42 activity**  
2 **during cell polarity and cytokinesis**

3 Brian S. Hercyk<sup>1</sup>, Julie T. Rich-Robinson<sup>1</sup>, Ahmad S. Mitoubsi<sup>1</sup>, Marcus A. Harrell<sup>1</sup>, and Maitreyi  
4 E. Das<sup>1§</sup>

5

6 <sup>1</sup>Department of Biochemistry & Cellular and Molecular Biology, University of Tennessee,  
7 Knoxville, TN, USA.

8 **§Corresponding Author:** [mdas@utk.edu](mailto:mdas@utk.edu)

9 **Running Title:** Cdc42 GEFs crosstalk regulates Cdc42

10 **Key words:** Cdc42, GEF, Scd1, Gef1, polarity, cytokinesis

11 **Summary Statement:** Cdc42 GEFs Gef1 and Scd1 crosstalk to fine-tune Cdc42 activity. This  
12 crosstalk promotes bipolar growth and maintains cell shape in fission yeast.

13 **ABSTRACT**

14 Cdc42, a conserved regulator of cell polarity, is activated by two GEFs, Gef1 and Scd1, in  
15 fission yeast. While *gef1* and *scd1* mutants exhibit distinct phenotypes, how they do so is  
16 unclear given that they activate the same GTPase. Using the GEF localization pattern during  
17 cytokinesis as a paradigm, we report a novel interplay between Gef1 and Scd1 that spatially  
18 modulates Cdc42. We find that Gef1 promotes Scd1 localization to the division site during  
19 cytokinesis and to the new end during polarized growth through the recruitment of the scaffold  
20 Scd2 via a Cdc42 feedforward pathway. Gef1-mediated Scd1 recruitment at the new end  
21 enables the transition from monopolar to bipolar growth. Reciprocally, Scd1 restricts Gef1  
22 localization to prevent ectopic Cdc42 activation during cytokinesis to promote cell separation  
23 and during interphase to maintain cell shape. Our findings reveal an elegant regulatory pattern  
24 in which Gef1 establishes new sites of Scd1-mediated Cdc42 activity, while Scd1 restricts Gef1  
25 to functional sites. We propose that crosstalk between GEFs is a conserved mechanism that  
26 orchestrates Cdc42 activation during complex cellular processes.

27

## 28 INTRODUCTION

29 Growth and division, fundamental processes in all cells, are essential for proper function and  
30 proliferation, and function through polarization. Cell polarization relies on the ability of the  
31 cytoskeleton to establish unique domains at the cell cortex to govern the local function and  
32 activity of specific proteins (Drubin and Nelson, 1996; Nance and Zallen, 2011). The Rho family  
33 of small GTPases serves as the primary regulators of cell polarity via actin regulation (Ridley,  
34 2006). Active Rho GTPases bind and activate downstream targets which regulate actin  
35 cytoskeleton organization. GTPases are active when GTP-bound and inactive once they  
36 hydrolyze GTP to GDP. Guanine nucleotide Exchange Factors (GEFs) activate GTPases by  
37 promoting the binding of GTP, while GTPase Activating Proteins (GAPs) inactivate GTPases by  
38 promoting GTP hydrolysis (Bos et al., 2007). Unraveling the regulation of these GEFs and  
39 GAPs is at the crux of understanding how cell polarity is established, altered, and maintained.  
40 One conserved member of the Rho family of small GTPases, Cdc42, is a master regulator of  
41 polarized cell growth and membrane trafficking in eukaryotes (Estravis et al., 2012; Estravis et  
42 al., 2011; Etienne-Manneville, 2004; Harris and Tepass, 2010; Johnson, 1999). Like other small  
43 GTPases, Cdc42 acts as a binary molecular switch and can respond to and initiate multiple  
44 signaling pathways. In most eukaryotes, Cdc42 is regulated by numerous GEFs and GAPs,  
45 complicating our understanding of GTPase regulation (Bos et al., 2007). In the fission yeast  
46 *Schizosaccharomyces pombe*, Cdc42 is activated by two GEFs, Gef1 and Scd1 (Chang et al.,  
47 1994; Coll et al., 2003). The presence of only two Cdc42 GEFs, and the well-documented  
48 process of cell polarization in these cells, make fission yeast an excellent model system to  
49 understand the mechanistic details of cell shape establishment. Here we report that the two  
50 Cdc42 GEFs regulate each other during both cytokinesis and polarized growth. This finding  
51 provides new insights into the spatiotemporal regulation of Cdc42 during critical cellular events.

52 Fission yeast cells are rod-shaped and grow in a polarized manner from the two ends. These  
53 cells exhibit a unique growth pattern; cells in early G2 phase are monopolar, and grow from the  
54 old end, which existed in the previous generation. Cells transition to a bipolar growth pattern in  
55 late G2 through the process of new end take off (NETO), when growth initiates at the new end,  
56 which was formed during sister cell separation (Mitchison and Nurse, 1985). Due to this simple  
57 growth pattern, fission yeast is an excellent model to understand how a cell regulates polarized  
58 growth from multiple sites. In fission yeast, active Cdc42 displays anti-correlated oscillations  
59 between the two ends (Das et al., 2012). These oscillations arise from both positive and time-  
60 delayed negative feedback as well as from competition between the two ends (Das et al., 2012).

61 The regulation that gives rise to the oscillatory pattern also regulates cell dimensions and  
62 promotes bipolar growth in fission yeast. Similar Cdc42 oscillations have been observed in  
63 natural killer cells during immunological synapse formation (Carlin et al., 2011) and in budding  
64 yeast during bud emergence (Howell et al., 2012). In plant cells, the ROP GTPases show  
65 oscillatory behavior during pollen tube growth (Hwang et al., 2005). Furthermore, during  
66 migration in animal cells, the GTPases Rho, Rac, and Cdc42 are sequentially activated to  
67 enable cell protrusion (Machacek et al., 2009). These observations suggest that oscillatory  
68 behavior, which drives cell polarity, may be an intrinsic property of GTPases that is likely  
69 conserved in most organisms (Das and Verde, 2013).

70 Cdc42 undergoes precise spatiotemporal regulation to efficiently promote different cellular  
71 processes. In fission yeast, Cdc42 must be activated at the cell ends to promote polarized  
72 growth and restricted from the cell sides to maintain cell shape (Das et al., 2012; Das et al.,  
73 2015; Das et al., 2009). Cdc42 is also involved in cytokinesis in fission yeast. During  
74 cytokinesis, Cdc42 activation promotes septum formation, and like in other systems, Cdc42  
75 needs to be subsequently inactivated to promote cell separation (Atkins et al., 2013; Onishi et  
76 al., 2013; Wei et al., 2016). The regulatory mechanisms that allow for these spatiotemporal  
77 activation patterns are not well understood. To explain Cdc42 activation during polarized  
78 growth, it is important to first understand how Cdc42 regulators function. Gef1 and Scd1 are  
79 partially redundant but exhibit unique phenotypes when deleted (Chang et al., 1994; Coll et al.,  
80 2003), indicating that they may regulate Cdc42 in distinct, but overlapping, manners. Scd1  
81 oscillates between the two cell ends, much like active Cdc42 (Das et al., 2012), and is essential  
82 for polarity establishment (Chang et al., 1994). Scd1 is also required for mating and contributes  
83 to Cdc42-dependent exploration of the cell cortex (Bendezu and Martin, 2013). In contrast, *gef1*  
84 mutants are narrower and grow in a monopolar, rather than a bipolar, manner (Coll et al., 2003).  
85 Furthermore, Cdc42 activity is reduced at the new end in *gef1* mutants (Das et al., 2012). Given  
86 that Gef1 is sparsely localized to the cortex (Das et al., 2015; Tay et al., 2018) and not required  
87 for polarity establishment, it is unclear why Gef1 is required for bipolar growth. Understanding  
88 how Gef1 regulates bipolar growth will provide valuable insights into Cdc42 regulation.

89 Investigations into the behaviors of Gef1 and Scd1 during interphase are complicated since  
90 these GEFs overlap at sites of polarized growth. These GEFs also localize to the site of cell  
91 division during cytokinesis (Wei et al., 2016). Cytokinesis, the final step in cell division, involves  
92 the formation of an actomyosin ring that constricts, concurrent with cell wall (septum) deposition,  
93 to enable membrane ingression and furrow formation (Pollard, 2010). The temporal localization

94 and function of the two GEFs are discernible during cytokinesis since they are recruited to the  
95 division site in succession to activate Cdc42. During cytokinesis, Gef1 localizes first to the  
96 actomyosin ring to activate Cdc42 and promote ring constriction (Wei et al., 2016). Next, Scd1  
97 localizes to the ingressing membrane and regulates septum formation (Wei et al., 2016). The  
98 temporal difference between Gef1 and Scd1 localization at the division site allows us to  
99 investigate the significance of the GEFs in Cdc42 regulation, which is unclear from studies  
100 solely of the growing ends.

101 Bipolar growth occurs when the new end is able to overcome the dominance at the old end.  
102 Here we show that Gef1 enables the new end to overcome old end dominance and promote  
103 bipolar growth. We find that in *gef1* mutants both the Cdc42 GEF Scd1 and its scaffold Scd2 are  
104 localized mainly to the old ends. Using cytokinesis as a paradigm to investigate how Gef1  
105 regulates Scd1 localization, we identify a novel crosstalk between Gef1 and Scd1. Our data  
106 indicate that Gef1 promotes the localization of Scd1 to the division site via Cdc42 activation.  
107 The scaffold Scd2 is required for Scd1 localization and binds active Cdc42 (Endo et al., 2003;  
108 Kelly and Nurse, 2011). Our data indicate that Gef1 activates Cdc42 that then recruits Scd2 and  
109 consequently Scd1. We extend these observations to the sites of polarized growth, where we  
110 show that Gef1 promotes bipolar Scd1 and Scd2 localization; indeed, Gef1 is necessary to  
111 recruit Scd1 to the non-dominant new end to initiate bipolar growth. While Gef1 promotes  
112 recruitment of Scd1 to initiate new site of Cdc42 activation, we find that Scd1 prevents ectopic  
113 Gef1 localization to the division site and the cell cortex. By this manner of regulation, Cdc42  
114 activation is promoted at the new end of the cell with no prior growth history, but is restricted  
115 from random sites. To our knowledge, such crosstalk has not been reported to function between  
116 GEFs of the same GTPase. The interplay between the Cdc42 GEFs operates in the same  
117 manner during both cytokinesis and polarized growth, suggesting that this may be a conserved  
118 feature of Cdc42 regulation.

## 119 RESULTS

### 120 **Gef1 enables the transition from monopolar to bipolar growth**

121 Fission yeast transitions from monopolar to bipolar growth upon reaching a certain size  
122 (Mitchison and Nurse, 1985). It has been proposed that this size requirement is necessary to  
123 establish two stable regions of Cdc42 activity (Das et al., 2012). Additionally, since protein  
124 abundance scales with cell size, this may allow for the accumulation of sufficient GEFs and  
125 other polarity factors to maintain two sites of Cdc42 activity (Das et al., 2012). As per these  
126 models, it has been suggested that in *gef1Δ* cells the total active Cdc42 levels are insufficient to  
127 allow bipolar growth, thus resulting in monopolarity. However, the dependence of bipolarity on  
128 cell size and protein abundance cannot be explained in G1-arrested *cdc10-129* mutants (Marks  
129 et al., 1986). *cdc10-129* cells shifted to 36°C remain monopolar even as they grow longer  
130 compared to *cdc10+* cells (Figure 1A). Alternatively, it is possible that bipolar growth requires  
131 intricate regulation of Cdc42 activation at the new end, and that Gef1 is specifically involved in  
132 this process.

133 We examined the growth patterns of *gef1Δ* mutants to gain insight into the transition to bipolar  
134 growth. The old ends in fission yeast initiate growth immediately after completion of division and  
135 cell separation. As the cell elongates, it eventually begins to grow at the new end, resulting in  
136 bipolar growth (Figure 1B) (Mitchison and Nurse, 1985). The two ends in fission yeast compete  
137 for active Cdc42; at first the old end wins this competition (Das et al., 2012). The old end can  
138 thus be said to be dominant over the new end in a newborn cell, and always initiates growth  
139 first. The new end must overcome the old end's dominance in order to initiate its growth.

140 We find that 68% of monopolar *gef1Δ* mutant cells exhibit a growth pattern in which one  
141 daughter cell is monopolar and the other daughter cell is prematurely bipolar (Figures 1C and  
142 S1). In monopolar *gef1Δ* cells, growth predominantly occurs at the old end, which grew in the  
143 previous generation (Figures 1C and S1). In these monopolar cells, the new end frequently fails  
144 to grow since it cannot overcome the old end's dominance. The daughter cell that inherits its  
145 parent cell's non-growing end typically displays precocious bipolar growth, indicating that these  
146 cells do not contain a dominant end. Our data suggest that for a cell end to be dominant it  
147 needs to have grown in the previous generation. These results indicate that the new ends of  
148 *gef1Δ* cells are not well-equipped to overcome old end dominance. Indeed, we find that in *gef1+*  
149 cells, 97% of daughter cells derived from a growing end display a normal growth pattern in  
150 which new end take-off (NETO) occurs only after the old end initiates growth (Figure 1C,D). In

151 *gef1Δ* cells, only 9% of daughter cells derived from a growing end display NETO; instead, 81%  
152 of daughter cells derived from a growing end failed to initiate growth at their new end and were  
153 thus monopolar (Figure 1C,D). These data reveal that Gef1 enables the new end to overcome  
154 old end dominance to promote bipolar growth.

155

### 156 **Gef1 enables bipolar localization of Scd1 and Scd2 to the cell poles**

157 To address the mechanism through which Gef1 enables bipolar growth, we examined other  
158 polarity factors that promote Cdc42 activation, Scd1 and Scd2. Scd1 and Scd2, like active  
159 Cdc42, undergo oscillations between the two competing ends (Das et al., 2012); thus, a cell  
160 undergoing bipolar growth does not always display bipolar Scd1 or Scd2 localization. We find  
161 that fewer new ends in *gef1Δ* cells exhibited Scd1-3xGFP; bipolar Scd1-3xGFP was observed in  
162 30% of interphase *gef1+* cells, but only in 14% of *gef1Δ* cells (Figure 2A,B; p=0.0004). Similarly,  
163 we observed a decrease in bipolar Scd2 in cells lacking *gef1*; 70% of *gef1+* cells displayed  
164 bipolar Scd2-GFP localization, but this was reduced to 30% in *gef1Δ* cells (Figure 2A,B,  
165 p<0.0001). While these data suggest that Gef1 promotes Scd1 and Scd2 localization to the new  
166 end to enable bipolar growth, this interpretation suffers from some complications. The old and  
167 new ends compete with each other for active Cdc42 (Das et al., 2012). It is possible that in  
168 *gef1Δ* mutants the new end fails to grow since the old end traps Scd1 and Scd2, resulting in  
169 monopolar distribution of these proteins. This would suggest that Gef1 removes Scd1 and Scd2  
170 from the old end, thereby making it available for the new end. However, we did not find  
171 enhanced Scd1-3xGFP levels at the old end in *gef1Δ* cells compared to *gef1+* cells (Figure S2).  
172 This suggests that Gef1 does not prevent accumulation of Scd1 and Scd2 at the old ends.  
173 Alternately, it is possible that Gef1 and Scd1 act independently to activate Cdc42 that the old  
174 and new ends compete for. As the level of total active Cdc42 increases, it saturates the  
175 dominant old end and the new end is now able to initiate growth and localize Scd1 and Scd2. In  
176 this scenario, Scd1 and Scd2 localization at the new end would be an indirect effect of  
177 increased Cdc42 activity and loss of competition at the old end. To distinguish whether Scd1  
178 and Scd2 localization at the new end requires Gef1, or whether it is an indirect outcome simply  
179 due to saturation of active Cdc42 at the old end, we turned to the division site. The division site  
180 does not compete with any other site in the cell for active Cdc42. Moreover, the localization of  
181 the GEFs can be temporally resolved at this site allowing us to examine the relationship  
182 between Gef1, Scd1, and Scd2.

### 183 **Gef1 promotes Scd1 recruitment to the division site**

184 We have reported that Scd1 localizes to the membrane adjacent to the actomyosin ring after  
185 Gef1 to activate Cdc42 along the membrane barrier (Wei et al., 2016). Since Scd1 arrives at the  
186 division site soon after Gef1, it is possible that Gef1 promotes Scd1 localization. Alternately, if  
187 Gef1 and Scd1 act independently, then loss of *gef1* would not impact Scd1 localization to the  
188 division site. To test this, we examined whether Scd1 localization to division site is Gef1-  
189 dependent. Both Gef1 and Scd1 are low-abundance proteins and are not suitable for live cell  
190 imaging over time. This complicates the investigation of the temporal localization of these  
191 proteins. To overcome this limitation, we used the actomyosin ring as a temporal marker. The  
192 actomyosin ring undergoes visibly distinct phases during cytokinesis: assembly, maturation,  
193 constriction, and disassembly. We determined the timing of protein localization to the division  
194 site by comparing it to the corresponding phase of the actomyosin ring. We have previously  
195 reported that ring constriction is delayed in *gef1Δ* mutants (Wei et al., 2016). To eliminate any  
196 bias in protein localization due to this delay, we only analyzed cells in which the rings had  
197 initiated constriction. In *gef1Δ* mutants, the number of constricting rings that recruited Scd1-  
198 3xGFP decreased to 15% from 96% in *gef1+* (Figure 2C,D,  $p < 0.0001$ ). Furthermore, the *gef1Δ*  
199 cells that managed to recruit Scd1-3xGFP did not do so as efficiently as *gef1+* cells, given the  
200 15% decrease in Scd1-3xGFP fluorescence intensity at the division site (Figure 2C,E,  
201  $p = 0.0089$ ). This indicates that Gef1 promotes Scd1 localization to the division site and that the  
202 two GEFs are not independent.

203

### 204 **Cdc42G12V is sufficient to restore Scd1 to the CDS in *gef1Δ***

205 Next, we investigated how Gef1 promotes Scd1 recruitment to the division site. GEF recruitment  
206 to sites of Cdc42 activity occurs via positive feedback, as reported in budding yeast (Butty et al.,  
207 2002; Irazoqui et al., 2003; Kozubowski et al., 2008). In this model, activation of Cdc42 leads to  
208 further recruitment of the scaffold BEM1, which then recruits the GEF CDC24 to the site of  
209 activity, thus helping to break symmetry and promote polarized growth. A similar positive  
210 feedback may also exist in fission yeast (Das et al., 2012; Das and Verde, 2013). We  
211 hypothesized that Gef1-activated Cdc42 acts as a seed for Scd1 recruitment to the division site.  
212 To test this, we asked whether constitutive activation of Cdc42 could rescue the Scd1  
213 recruitment defect exhibited by *gef1Δ*. In order for this approach to work, the constitutively  
214 active Cdc42 must localize to the division site. Localization of active Cdc42 is visualized via the



215 bio-probe CRIB-3xGFP that specifically binds GTP-Cdc42. Since our previous work reported  
216 that Cdc42 activity is reduced at the division site in *gef1Δ* cells (Wei et al., 2016), we validated  
217 this approach by first testing whether constitutively active Cdc42 restores CRIB-3xGFP  
218 localization at the division site in *gef1Δ* cells. The constitutively active allele *cdc42G12V* and the  
219 bio-probe CRIB-3xGFP were expressed in *gef1+* and *gef1Δ* cells. Mild expression of  
220 *cdc42G12V* was sufficient to restore CRIB-3xGFP intensity at the division site to physiological  
221 levels in *gef1Δ* (Figure 3A,B,  $p < 0.0001$ ). Likewise, expression of *cdc42G12V* restored Scd1-  
222 tdTomato localization to the division site in *cdc42G12V gef1Δ* cells (Figure 3C,D). This  
223 demonstrates that active Cdc42 alone is sufficient to recruit Scd1. Next, we asked how does  
224 active Cdc42 promote Scd1 localization. We examined downstream targets of active Cdc42 for  
225 this purpose. The Cdc42 ternary complex consists of the GEF Scd1, the scaffold protein Scd2,  
226 and the downstream effector Pak1 kinase (Endo et al., 2003). Observations in budding yeast  
227 suggest that the PAK kinase may mediate GEF recruitment (Kozubowski et al., 2008). Contrary  
228 to this hypothesis, we find that Scd1-3xGFP intensity increases in the *nmt1 switch-off* mutant  
229 allele of *pak1*, compared to *pak1+* cells (Figure S3). These findings support similar observations  
230 reported in the hypomorphic temperature-sensitive *pak1* allele, *orb2-34* (Das et al., 2012), and  
231 indicate that *pak1* does not facilitate Scd1 recruitment to the site of action.

232

### 233 **Gef1 promotes Scd2 localization to the division site, which in turn recruits Scd1**

234 Scd2 is a component of the Cdc42 ternary complex, and binds active Cdc42 (Endo et al., 2003;  
235 Wheatley and Rittinger, 2005). We hypothesized that Gef1-dependent active Cdc42 recruits  
236 Scd1 to the division site through the scaffold Scd2. If this were true, Scd2-GFP localization to  
237 the division site should be Gef1-dependent. Indeed, we find that *gef1Δ* cells displayed a  
238 significant decrease in Scd2-GFP-containing assembled rings compared to *gef1+* cells. In *gef1Δ*  
239 mutants, the number of rings that recruited Scd2-GFP prior to ring constriction decreased to 8%  
240 compared to 88% in *gef1+*, indicating a delay in Scd2 recruitment (Figure 4A,B,  $p > 0.0001$ ).  
241 Although *gef1Δ* cells were able to recruit Scd2 to the division site once ring constriction began,  
242 the fluorescence intensity of Scd2-GFP at the division site was reduced by 61% compared to  
243 *gef1+* cells (Figure 4A,C,  $p > 0.0001$ , Figure S4). Gef1 thus promotes Scd2 localization to the  
244 division site. Since previous work indicates that Scd1 and Scd2 require each other for their  
245 localization (Kelly and Nurse, 2011), it is possible that a decrease in Scd2 at the division site  
246 observed in *gef1* mutants is due to a decrease in Scd1 at this site. However, contrary to  
247 previous findings, we observed that Scd2-GFP localization at the division site is not impaired in

248 *scd1Δ* cells (Figure 4D). In contrast, Scd1-3xGFP localization is completely abolished at the  
249 division site in *scd2Δ* cells (Figure 4E). We find that Scd1 requires Scd2 for its localization to the  
250 division site. Scd2 localization, on the other hand, is independent of Scd1 and depends on Gef1  
251 instead.

252 Altogether, our data reveal that Gef1 promotes Scd2 localization to the division site, which then  
253 recruits Scd1. Based on these data, we hypothesized that Gef1, Scd2, and Scd1 sequentially  
254 localize to the division site. To test this, we examined the temporal localization of these proteins  
255 to the division site. Since these proteins do not lend themselves to extended time lapse imaging,  
256 we used the spindle pole bodies as an internal timer. The distance between spindle pole bodies  
257 is a well-established temporal marker to determine a cell's cytokinetic stage. The spindle pole  
258 body distance increases as mitosis progresses until the cell reaches anaphase B (Nabeshima et  
259 al., 1998), at which time the actomyosin ring starts to constrict (Wu et al., 2003). The distance  
260 between the two spindle pole bodies is thus used as an internal clock that helps to time the  
261 recruitment of other proteins (Nabeshima et al., 1998). We acquired numerous still images and  
262 calculated the distance between the spindle pole bodies, marked by Sad1-mCherry, during  
263 anaphase A or anaphase B. We report the spindle pole body distance at which Gef1-mNG  
264 (monomeric NeonGreen), Scd1-3xGFP, and Scd2-GFP signals are visible at the division site  
265 before the actomyosin rings starts constriction (Figure 5A). Next, we calculated the spindle pole  
266 body distance at which Gef1-mNG, or Scd2-GFP or Scd1-3xGFP were observed at the division  
267 site. We find that Gef1-mNG and Scd2-GFP appear around the same time during mitosis with a  
268 mean spindle pole body distance of 5.9 $\mu$ m, and 6.6  $\mu$ m, respectively (Figure 5B. not significant).  
269 Scd1-3xGFP arrives later with a longer mean spindle pole body distance of 7.6 $\mu$ m (Figure 5B.  
270  $p=0.005$ ). Next, we employed dual color imaging of cells expressing two fluorescently tagged  
271 proteins to validate the findings above. In cells expressing both Gef1-tdTomato and Scd2-GFP,  
272 100% of assembled rings with Gef1 invariably also had Scd2 at the division site (Figure 5C,D).  
273 In cells expressing Scd2-GFP and Scd1-tdTomato, 59% of assembling rings localized both  
274 Scd2 and Scd1, while 41% contained only Scd2 (Figure 5C,D). In cells expressing both Gef1-  
275 tdTomato and Scd1-3xGFP, 61% of assembling rings with Gef1 also had Scd1, while 39%  
276 contained only Gef1 (Figure 5C,D). Altogether, this demonstrates that Gef1 recruits Scd2 to ring  
277 prior to Scd1.

278

279

## 280 **Gef1 recruits Scd1 to the new end via Cdc42 activation**

281 Next, we asked if Gef1 recruits Scd1 to the new end via Cdc42 activation, just as it does at the  
282 division site. We first tested whether expression of constitutively active Cdc42 results in bipolar  
283 localization of active Cdc42 in *gef1Δ* cells, as indicated by CRIB-3xGFP localization. Low-level  
284 expression of *cdc42G12V* was sufficient to restore bipolar CRIB-3xGFP localization in *gef1Δ*,  
285 compared to the empty-vector-containing *gef1Δ* mutants (Figure 6A,B;  $p < 0.0001$ ). We observed  
286 bipolar CRIB-3xGFP in 35% of *gef1+* cells transformed with the empty vector and in 36% of  
287 cells expressing *cdc42G12V*. In *gef1Δ* mutants transformed with the empty vector, we observed  
288 bipolar CRIB-3xGFP in only 8% of cells. In contrast, in *gef1Δ* mutants, low levels of *cdc42G12V*  
289 expression restored bipolar CRIB-3xGFP to 34%. In the same cells, we observed bipolar Scd1-  
290 tdTomato in 21% of *gef1+* cells transformed with the empty vector, and in 23% of cells  
291 expressing *cdc42G12V*. In *gef1Δ* mutants transformed with the empty vector, we observed  
292 bipolar Scd1-tdTomato in only 6% of cells. Further, in *gef1Δ* mutants expressing low levels of  
293 *cdc42G12V*, bipolar Scd1-tdTomato was restored to 19% (Figure 6A,C). Thus, expression of  
294 *cdc42G12V* was sufficient to restore bipolar Scd1-tdTomato localization to the cell ends in  
295 *gef1Δ* mutants, just as it was at the division site (Figure 6A,C). This demonstrates that Gef1  
296 promotes Scd1 localization to the new ends through Cdc42 activation. As a further test, we  
297 asked whether Scd1 localization would be enhanced at the new end in the precociously bipolar  
298 *gef1S112A* mutant, in which Gef1S112A constitutively localizes to the cortex. Indeed, we find  
299 that 52% of *gef1S112A* cells show bipolar Scd1-3xGFP localization, while this is seen in only  
300 33% of *gef1+* cells (Figure S5;  $p < 0.0001$ ). At the division site, Gef1 colocalizes with the scaffold  
301 Scd2, which then recruits Scd1. While Scd1 requires Scd2 for its localization, Scd2 localization  
302 is independent of Scd1 (Figure S6). Scd2 binds active Cdc42, so it is possible that Cdc42  
303 activation mediated by Gef1 leads to Scd2 recruitment. To test this, we monitored ectopic Gef1  
304 localization in fission yeast cells. In cells treated with the actin-depolymerizing drug Latrunculin  
305 A (LatA) Gef1-tdTomato ectopically localizes to the cell sides (Figure 6D). In these cells, Scd2-  
306 GFP colocalizes with ectopic Gef1-tdTomato at the cell sides. Moreover, in *gef1Δ* cells Scd2-  
307 GFP fails to localize to the cell sides upon LatA treatment (Figure 6E). In these cells, Scd2-GFP  
308 remains at the cell ends, but the levels are much reduced. This provides further evidence that  
309 Gef1 marks the site for Scd2 recruitment at the cell cortex.

310

311

312 **Scd1 prevents ectopic Gef1 localization to the cell cortex and the division site.**

313 Cells treated with LatA show ectopic Cdc42 activation at the cell sides (Mutavchiev et al., 2016).  
314 We find that LatA treatment leads to ectopic Gef1 and Scd2 localization to the cell sides. As  
315 reported earlier, we find that LatA treatment leads to a severe loss in Scd1-mNG levels at the  
316 cell ends and at the site of cell division (Figure S7). We asked if ectopic Gef1 localization in  
317 LatA-treated cells is due to loss of Scd1 from the cell cortex. To test this, we analyzed Gef1-  
318 mNG localization in *scd1Δ* mutants. We find that in *scd1+* cells, Gef1-mNG is mostly  
319 cytoplasmic and displays sparse but polarized localization at cell ends (Figure 7Ai). In *scd1Δ*  
320 mutants, Gef1-mNG shows depolarized cortical localization with random patches all over the  
321 cortex similar to that in *scd1+* cells treated with LatA (Figure 7Aii,v). Gef1-mNG localization in  
322 *scd1Δ* cells treated with LatA is similar to that in untreated *scd1Δ* cells. This suggests that Scd1  
323 is required to prevent ectopic Gef1 localization and restricts it to the cell ends.

324 Next, we asked if ectopic Gef1 in *scd1Δ* cells and in LatA-treated cells leads to ectopic Cdc42  
325 activation. We find that active Cdc42 appears depolarized in *scd1Δ* mutants during interphase.  
326 While CRIB-3xGFP remains restricted to the ends in *scd1+* cells, in *scd1Δ* mutants its  
327 localization appears as random patches all over the cortex (Figure 7Bi,ii). LatA treatment leads  
328 to ectopic CRIB-3xGFP (Mutavchiev et al., 2016) and this is abolished in *gef1Δ* cells (Figure  
329 7Bvii,ix). In *gef1Δ* cells with LatA, CRIB-3xGFP remains at the cell ends, but at lower levels  
330 compared to untreated cells. This indicates that Scd1 is functionally epistatic to actin in the  
331 removal of Gef1 from the cell cortex. Together, these data demonstrate that Scd1 at the cells  
332 ends prevents ectopic Gef1 localization and Cdc42 activation.

333 Since we find that Scd1 regulates Gef1 localization at sites of polarized growth, we asked  
334 whether a similar relationship also occurs at the division site to facilitate Gef1 removal. To test  
335 this, we analyzed Gef1 localization in *scd1Δ* mutants. We observed persistent Gef1 localization  
336 in *scd1* mutants after ring constriction. In *scd1Δ* mutants, after completion of ring constriction  
337 and disassembly, Gef1 remains at the membrane that was adjacent to the ring (Figure 7C).  
338 Among *scd1Δ* cells that had completed constriction, 70% show persistent Gef1-mNG at the  
339 newly formed membrane barrier, as confirmed by the absence of Rlc1-tdTomato (Figure 7C,D).  
340 Similar Gef1-mNG localization was observed in only 20% of *scd1+* cells (Figure 7C,D,  
341  $p < 0.0001$ ).

342 We find that Gef1-mNG removal from the division site is also dependent on actin. We analyzed  
343 Gef1 localization in cells with an actin cytoskeleton disrupted via Latrunculin A (LatA) treatment.

344 In LatA-treated cells that were fully septated following completion of ring constriction, we  
345 observed persistent Gef1 localization at the division site. Gef1-mNG persists on both sides of  
346 the septum barrier in 40% of cells treated with LatA, but not in mock DMSO-treated cells (Figure  
347 7E,F). Our data demonstrate that the actin cytoskeleton promotes Scd1 localization and that  
348 Scd1 promotes Gef1 removal from the division site. To confirm that actin promotes Gef1  
349 removal via Scd1, we looked for a functional epistatic relationship between Scd1 and actin. We  
350 treated *scd1+* and *scd1Δ* cells expressing Gef1-mNG with LatA or DMSO. We find that in cells  
351 treated with DMSO, Gef1-mNG persists in 20% of septated *scd1+* cells and in 63% of septated  
352 *scd1Δ* cells. In cells treated with LatA, Gef1-mNG persists in 40% of septated *scd1+* cells and in  
353 61% of septated *scd1Δ* cells (Figure 7F). The extent of Gef1 persistence in *scd1Δ* cells does not  
354 increase with the addition of LatA. This indicates that Scd1 is functionally epistatic to actin in the  
355 process of Gef1 removal (Figure 7F). Together, these data suggest that Scd1 removes Gef1  
356 from the division site after ring disassembly.

357 To determine the significance of Scd1-mediated removal of Gef1 from the division site, we  
358 looked at the constitutively localized *gef1S112A* mutant. We confirmed that Gef1S112A persists  
359 at the division site after ring constriction. In control cells, Gef1-3xYFP is lost from the division  
360 site after the completion of ring constriction, indicated by the absence of Cdc15-tdTomato-  
361 marked actomyosin ring (Figure S8 A). However, Gef1S112A-3xYFP persists at the division site  
362 after ring constriction (Figure S8 A). Live cell imaging revealed that cell separation is delayed in  
363 *gef1S112A* mutants. Cell separation occurred 28 min after ring constriction in *gef1+* cells, but at  
364 34 min in *gef1S112A* mutants (Figure S8 B,  $p=0.009$ ). We have previously shown that  
365 prolonged Cdc42 activation at the division site impairs cell separation, as seen in other model  
366 systems (Atkins et al., 2013; Onishi et al., 2013; Wei et al., 2016). This would necessitate the  
367 removal of the GEFs from the division site. Our data indicate that Scd1-mediated Gef1 removal  
368 promotes cell separation.

## 369 DISCUSSION

370 Polarity is essential for cell viability and development, as it regulates diverse processes such as  
371 motility, cell adhesion, secretion, determination of the division plane, and maintenance of cell  
372 fate. While studies in yeast continue to pioneer insights into the regulation of cell polarity, one  
373 aspect of *S. pombe* polarity remains elusive: how cells initiate growth at a second site during  
374 NETO (new end take-off). Since Cdc42 is the primary regulator of polarized growth, we  
375 examined its regulation during this process. We find that Gef1 enables the new end to  
376 overcome old end growth dominance to initiate bipolar growth. Our data indicate that Gef1  
377 promotes the localization of the other GEF Scd1 to the new end. To uncover the mechanism by  
378 which this occurs, we examined the relationship between these two GEFs at the division site,  
379 where the localization of both these GEFs are easily monitored. We have recently shown that  
380 Gef1 and Scd1 localize sequentially to the division site to activate Cdc42 during cytokinesis  
381 (Wei et al., 2016). Here, we take advantage of the temporal difference between Gef1 and Scd1  
382 localization at the division site to determine the significance of these two GEFs in Cdc42  
383 regulation. We uncover a novel interplay between the Cdc42 GEFs that functions in both  
384 cytokinesis and polarized cell growth (Figure 8A). Given the conserved nature of Cdc42 and its  
385 regulators, we posit that this interplay between the GEFs is a common feature of Cdc42  
386 regulation.

387

### 388 **Gef1-mediated Cdc42 activation promotes Scd1 recruitment via the scaffold Scd2.**

389 After division in fission yeast, the old end always initiates growth first. The two cell ends  
390 compete for active Cdc42, and initially the new end is incapable of overcoming dominance at  
391 the old end (Das et al., 2012). Gef1 has been shown to promote bipolar growth and cells lacking  
392 *gef1* are mostly monopolar (Coll et al., 2003; Das et al., 2012). Upon analysis of the growth  
393 pattern of *gef1* $\Delta$  mutants, we find that new ends frequently fail to overcome old end dominance,  
394 resulting in monopolar growth in these cells. Bipolar growth in *gef1* $\Delta$  mutants is typically  
395 observed in cells that do not contain a dominant old end. To determine how the new end  
396 overcomes old end growth dominance, we analyzed Cdc42 regulators in *gef1* $\Delta$  mutants. We  
397 find that Gef1 promotes bipolar localization of Scd1 to facilitate bipolar growth. Polarized growth  
398 requires Cdc42 activation, mediated through positive feedback (Das and Verde, 2013; Wu and  
399 Lew, 2013). In fission yeast, Scd1 is the positive-feedback-mediating GEF. Our data suggest

400 that Gef1 activates Cdc42 to establish a Scd1-dependent positive feedback pathway at the new  
401 end to overcome old end dominance and establish bipolar growth (Figure 8C).

402 Analysis of Gef1-dependent Scd1 recruitment at the new end is complicated by the dynamic  
403 nature of their localization patterns, the presence of two competing cell ends, and the fact that  
404 these proteins do not localize to the cell ends in large quantities. Therefore, we investigated  
405 Gef1 and Scd1 recruitment at the division site. Gef1 and Scd1 localize to the division site in a  
406 sequential manner. Moreover, during cytokinesis, the division site exclusively activates Cdc42  
407 and thus does not compete with any other site in the cell. We find that Scd1 localization is  
408 reduced at the division site in *gef1Δ* cells. Thus we posit that Gef1 localizes to the division site  
409 first, which enables recruitment of Scd1 (Figure 8B). Together with our observations at the cell  
410 ends, our data indicate that Gef1 promotes Scd1 localization via Cdc42 activation. Scd1  
411 recruitment to the site of action is dependent on the scaffold Scd2. Scd1 and Scd2 together  
412 promote a positive feedback pathway for Cdc42 activation, where Scd2 binds active Cdc42.  
413 Once Scd1 activates Cdc42, it binds Scd2, which then recruits additional Scd1 to activate more  
414 Cdc42. For such a pathway to function, Cdc42 first needs to be activated for the recruitment of  
415 Scd2, and consequently Scd1. Our data indicate that Gef1-mediated Cdc42 activation provides  
416 the seed for Scd1-Scd2 recruitment. We find that Gef1 and Scd2 localize to the division site  
417 first, followed by Scd1. Similarly, ectopic Gef1 localization as observed in LatA-treated cells  
418 shows complete colocalization with Scd2, suggesting that Gef1-mediated Cdc42 activation  
419 promotes Scd2 recruitment. This enables Scd2 recruitment to nascent sites that have no prior  
420 history of Cdc42 activation and helps Scd1 recruitment to those sites.

421

#### 422 **Scd1 prevents ectopic Gef1 localization.**

423 In fission yeast, Scd1 is the primary GEF that promotes polarized growth (Chang et al., 1994).  
424 We find that cells lacking *scd1* are depolarized due to ectopic Cdc42 activation, as a result of  
425 mislocalized Gef1. In the presence of *scd1*, Gef1 shows sparse cortical localization and is  
426 restricted to the cell ends. We find that cell ends that do not localize Scd1 either due to LatA  
427 treatment or due to *scd1Δ* display ectopic and enhanced cortical localization of Gef1. Thus we  
428 posit that Scd1 prevents ectopic Gef1 localization. A recent report shows that ectopic Cdc42  
429 activation in LatA-treated cells depends on the stress-activated MAP kinase Sty1 (Mutavchiev et  
430 al., 2016). Fission yeast cells treated with LatA did not display ectopic Cdc42 activation in the  
431 absence of *sty1*. It is possible that in the absence of actin, reduced Scd1 at the cell cortex elicits

432 a stress response, leading to Sty1 activation that results in the mislocalization of Gef1. Further  
433 analysis is necessary to test this hypothesis.

434 Similar to our observation at the cell cortex, we find that Gef1 persists at the division site in cells  
435 lacking Scd1 or in cells treated with LatA. Normally, Gef1 localization to the division site is lost  
436 after ring constriction (Wei et al., 2016). Here, we show that Scd1 promotes the clearance of  
437 Gef1 from the division site after ring disassembly (Figure 8A). Mis-regulation of Cdc42 has been  
438 reported to result in cytokinesis failure in many organisms. Specifically, failure to inactivate  
439 Cdc42 leads to failed cell abscission in budding yeast and HeLa cells, and prevents  
440 cellularization in *Drosophila* embryos (Atkins et al., 2013; Crawford et al., 1998; Dutartre et al.,  
441 1996; Onishi et al., 2013). The mechanism by which Cdc42 is inactivated prior to cell abscission  
442 is unclear. Our data suggest that Scd1 ensures that Gef1 does not persist at the division site in  
443 the final stages of cytokinesis, preventing inappropriate Cdc42 activation. Together, our data  
444 demonstrate an elegant regulatory pattern in which Gef1-mediated Scd1 recruitment to the  
445 division site promotes septum formation, and Scd1-mediated Gef1 removal promotes cell  
446 separation.

447

#### 448 **Multiple GEFs combinatorially regulate Cdc42 during complex processes.**

449 Polarized cell growth requires symmetry breaking, and several models have indicated a need  
450 for Cdc42 positive feedback loops in this process (Bendezu et al., 2015; Irazoqui et al., 2003;  
451 Kozubowski et al., 2008; Slaughter et al., 2009a; Slaughter et al., 2009b; Wedlich-Soldner et al.,  
452 2004). Elegant experiments in budding yeast demonstrate that local activation of Cdc42  
453 establishes positive feedback through the recruitment of additional GEFs to amplify the  
454 conversion of Cdc42-GDP to Cdc42-GTP (Butty et al., 2002; Kozubowski et al., 2008). A caveat  
455 of positive feedback is that the site that first activates Cdc42 can act as a sink that traps the  
456 GEFs, thereby preventing Cdc42 activation at other sites. Such a trap can be undone via  
457 negative feedback regulation of Cdc42 that results in an oscillatory pattern at the cell ends (Das  
458 et al., 2012; Howell et al., 2012). Negative feedback has reported in *S. pombe* and *S. cerevisiae*  
459 through the Pak1 kinase activity that antagonizes either the Cdc42 scaffold or the GEF (Das et  
460 al., 2012; Gulli et al., 2000; Kuo et al., 2014; Rapali et al., 2017). Indeed, *pak1* mutants fail to  
461 activate bipolar growth (Das et al., 2012; Verde et al., 1998). Our data show that in addition to  
462 the Pak1 kinase, Gef1 also contributes to initiation of bipolar growth.



463 The Cdc42 oscillatory pattern can be explained by the presence of positive feedback, time-  
464 delayed negative feedback, and competition between the two ends for active Cdc42. Since  
465 Scd1 is the Cdc42 GEF that establishes polarized growth, we posit that Scd1 activates Cdc42  
466 through positive feedback at the dominant old end. Dominance at the old end ensures that Scd1  
467 localization is mainly restricted to this end at the expense of the new end. A previous model  
468 suggests that as the cell reaches a certain size, the GEFs reach a threshold level that allows the  
469 new end to overcome old end dominance to initiate growth and promote bipolarity (Das et al.,  
470 2012). Threshold GEF levels alone cannot explain our findings since *gef1S112A* cells display  
471 bipolar growth at a smaller cell size (Das et al., 2015), while G1-arrested *cdc10-129* mutants  
472 grow to longer cell lengths but remain monopolar. Our data suggest that the regulatory crosstalk  
473 between the Cdc42 GEFs may provide an advantage to the cell and enables the new end to  
474 overcome old end dominance. Gef1 activates Cdc42 at the new end that then recruits *scd2* to  
475 finally recruit Scd1. Thus Gef1 triggers a positive feedback at the division site via a feed-forward  
476 pathway (Figure 8A,C). Given that Gef1 promotes Scd1-mediated polarized growth at the new  
477 end, it is conceivable that Gef1 itself is tightly regulated to prevent random Cdc42 activation.  
478 Indeed, Gef1 shows sparse localization to the cell ends and is mainly cytoplasmic (Das et al.,  
479 2015). The NDR kinase Orb6 prevents ectopic Gef1 localization via 14-3-3-mediated  
480 sequestration to the cytoplasm (Das et al., 2015; Das et al., 2009). Here we show that while  
481 Gef1 promotes Scd1 recruitment to a nascent site, Scd1 itself restricts Gef1 localization to the  
482 cell ends to precisely activate Cdc42 (Figure 8C). Together, our findings describe an elegant  
483 system in which the two Cdc42 GEFs regulate each other to ensure proper cell polarization.

484

#### 485 **Significance of GEF coordination in other systems.**

486 In budding yeast, CDC24 is required for polarization during bud emergence and is essential for  
487 viability (Sloat et al., 1981; Sloat and Pringle, 1978), unlike Scd1 in fission yeast. Budding yeast  
488 also has a second GEF Bud3, which establishes a proper bud site (Kang et al., 2014). During  
489 G1 in budding yeast, bud emergence occurs via biphasic Cdc42 activation by the two GEFs:  
490 Bud3 helps select the bud site (Kang et al., 2014), and Cdc24 allows polarization (Sloat et al.,  
491 1981; Sloat and Pringle, 1978). This is analogous to new end growth in fission yeast, which  
492 requires Gef1-dependent recruitment of Scd1 for robust Cdc42 activation. It would be interesting  
493 to test whether crosstalk also exists between Bud3 and Cdc24.

494 The Rho family of GTPases includes Rho, Rac, and Cdc42. In certain mammalian cells, Cdc42  
495 and Rac1 appear to activate cell growth in a biphasic manner (de Beco et al., 2018; Yang et al.,  
496 2016). For example, during motility, the GTPases, Rho, Rac, and Cdc42, regulate the actin  
497 cytoskeleton (Heasman and Ridley, 2008; Machacek et al., 2009). During cell migration, these  
498 GTPases form bands or 'zones' in the leading and trailing regions of the cell (Ridley, 2015).  
499 Their spatial separation is mediated by the organization of their GEFs and GAPs, as well as by  
500 regulatory signaling between these GTPases (Guilluy et al., 2011). Cdc42 and Rho are mutually  
501 antagonistic, explaining how such zones of GTPase activity can be established and maintained  
502 (Guilluy et al., 2011; Kutys and Yamada, 2014; Warner and Longmore, 2009). Similarly, Cdc42  
503 can refine Rac activity (Guilluy et al., 2011). Cdc42 and Rac are activated by similar pathways  
504 and share the same effectors. Several recent experiments demonstrate that during cell  
505 migration, reorganization of the actin cytoskeleton occurs in a biphasic manner, in which Cdc42  
506 activation at new sites sets the direction, while robust Rac activation determines the speed (de  
507 Beco et al., 2018; Yang et al., 2016). Unlike most eukaryotes, the genome of *S. pombe* does not  
508 contain a Rac GTPase. We speculate that the two Cdc42 GEFs of *S. pombe* allow it to fulfill the  
509 roles of both Cdc42 and Rac. Gef1 sets the direction of growth by establishing growth at a new  
510 site, while Scd1 promotes efficient growth through robust Cdc42 activation at the growth sites.  
511 In conclusion, we propose that the crosstalk between the Cdc42 GEFs themselves is an intrinsic  
512 property of small GTPases and is necessary for fine-tuning their activity.

## 513 MATERIALS AND METHODS

514

### 515 Strains and cell culture

516 The *S. pombe* strains used in this study are listed in Supplemental Table S1. All strains are  
517 isogenic to the original strain PN567. Cells were cultured in yeast extract (YE) medium and  
518 grown exponentially at 25°C, unless specified otherwise. Standard techniques were used for  
519 genetic manipulation and analysis (Moreno et al., 1991). Cells were grown exponentially for at  
520 least 3 rounds of eight generations each before imaging.

521

### 522 Microscopy

523 Cells were imaged at room temperature (23–25°C) with an Olympus IX83 microscope equipped  
524 with a VTHawk two-dimensional array laser scanning confocal microscopy system (Visitech  
525 International, Sunderland, UK), electron-multiplying charge-coupled device digital camera  
526 (Hamamatsu, Hamamatsu City, Japan), and 100×/numerical aperture 1.49 UAPO lens  
527 (Olympus, Tokyo, Japan). Images were acquired with MetaMorph (Molecular Devices,  
528 Sunnyvale, CA) and analyzed by ImageJ (National Institutes of Health, Bethesda, MD).

529

### 530 Analysis of growth pattern

531 The growth pattern of *gef1+* and *gef1Δ* cells was observed by live imaging of cells through  
532 multiple generations. Cells were placed in 3.5-mm glass-bottom culture dishes (MatTek,  
533 Ashland, MA) and overlaid with YE medium plus 1% agar, and 100μM ascorbic acid to minimize  
534 photo-toxicity to the cell. A bright-field image was acquired every minute for 12 hours. Birth  
535 scars were used to distinguish between, as well as to measure, old end and new end growth.

536

### 537 Construction of fluorescently tagged Gef1 fusion proteins

538 The forward primer 5'- GGATCCGTGTTTACCAAAGTTATGTAAGAC -3' with a 5' BamHI site  
539 and the reverse primer 5'- CCCGGGAACCCTCGCAGCTAAAGA -3' with a 5' XmaI site were  
540 used to amplify a 3kb DNA fragment containing *gef1*, the 5' UTR, and the endogenous  
541 promoter. The fragment was then digested with BamHI and XmaI and ligated into the BamHI-  
542 XmaI site of pKS392 pFA6-tdTomato-kanMX and pKG6507 pFA6-mNeonGreen-kanMX.  
543 Constructs were linearized by digestion with XbaI and transformed into the *gef1* locus in *gef1Δ*  
544 cells.

545

546 **Expression of constitutively active Cdc42**

547 *pjk148-nmt41x-leu1<sup>+</sup>* or *pjk148-nmt41x:cdc42G12V-leu1<sup>+</sup>* were linearized with NdeI and  
548 integrated into the *leu1-32* locus in *gef1<sup>+</sup>* and *gef1Δ* cells expressing either CRIB-3xGFP and  
549 Scd1-tdTomato, or Scd1-tdTomato and Rlc1-GFP. The empty vector *pjk148-nmt41x-leu1<sup>+</sup>* was  
550 used as control. Cells were grown in EMM with 0.05uM thiamine to promote minimal expression  
551 of *cdc42G12V*.

552

553 **Latrunculin A treatment**

554 Cells in YE were incubated at room temperature with 10μM or 100 μM Latrunculin A (Millipore-  
555 Sigma) dissolved in dimethyl sulfoxide (DMSO) for 40 min prior to imaging. Control cells were  
556 treated with 1% DMSO and incubated for 40 min.

557

558 **Analysis of fluorescent intensity**

559 Mutants expressing fluorescent proteins were grown to OD 0.5 and imaged on slides. Cells in  
560 slides were imaged for no more than 3 minutes to prevent any stress response as previously  
561 described (Das et al., 2015). Depending on the mutant and the fluorophore, 16-28 Z-planes  
562 were collected at a z-interval of 0.4μm for either or both the 488nm and 561nm channels. The  
563 respective controls were grown and imaged in an identical manner. ImageJ was used to  
564 generate sum projections from the z-series, and to measure the fluorescence intensity of a  
565 selected region (actomyosin ring, or growth cap at cell tip). The background fluorescence in a  
566 cell-free region of the image was subtracted to generate the normalized intensity. Mean  
567 normalized intensity was calculated for each image from all (n>5) measurable cells within each  
568 field. A Student's two-tailed t-test, assuming unequal variance, was used to determine  
569 significance through comparison of each strain's mean normalized intensities.

570

571 **Acknowledgements**

572 We thank J. Bembenek and T. Burch-Smith for critical review of our manuscript; K. Gould for  
573 supplying plasmids; and M. Balasubramanian, and S. Martin for providing strains.

574

575 **Competing Interest**

576 The authors do not have any financial or non-financial competing interests.

577

578 **Funding**

579 This work was supported by a grant from the National Science Foundation (1616495). J.R. was  
580 supported by NIH IMSD (R25GM086761) and is currently supported by an NSF GRFP  
581 (1452154).

582

583

584

585

586 **REFERENCES**

587 **Atkins, B. D., Yoshida, S., Saito, K., Wu, C. F., Lew, D. J. and Pellman, D.** (2013).  
588 Inhibition of Cdc42 during mitotic exit is required for cytokinesis. *J Cell Biol* **202**, 231-40.

589 **Bendezu, F. O. and Martin, S. G.** (2013). Cdc42 explores the cell periphery for mate  
590 selection in fission yeast. *Curr Biol* **23**, 42-7.

591 **Bendezu, F. O., Vincenzetti, V., Vavylonis, D., Wyss, R., Vogel, H. and Martin, S. G.**  
592 (2015). Spontaneous Cdc42 polarization independent of GDI-mediated extraction and actin-  
593 based trafficking. *PLoS Biol* **13**, e1002097.

594 **Bos, J. L., Rehmann, H. and Wittinghofer, A.** (2007). GEFs and GAPs: critical  
595 elements in the control of small G proteins. *Cell* **129**, 865-77.

596 **Butty, A. C., Perrinjaquet, N., Petit, A., Jaquenoud, M., Segall, J. E., Hofmann, K.,  
597 Zwahlen, C. and Peter, M.** (2002). A positive feedback loop stabilizes the guanine-nucleotide  
598 exchange factor Cdc24 at sites of polarization. *EMBO J* **21**, 1565-76.

599 **Carlin, L. M., Evans, R., Milewicz, H., Fernandes, L., Matthews, D. R., Perani, M.,  
600 Levitt, J., Keppler, M. D., Monypenny, J., Coolen, T. et al.** (2011). A targeted siRNA screen  
601 identifies regulators of Cdc42 activity at the natural killer cell immunological synapse. *Sci Signal*  
602 **4**, ra81.

603 **Chang, E. C., Barr, M., Wang, Y., Jung, V., Xu, H. P. and Wigler, M. H.** (1994).  
604 Cooperative interaction of *S. pombe* proteins required for mating and morphogenesis. *Cell* **79**,  
605 131-41.

606 **Coll, P. M., Trillo, Y., Ametzazurra, A. and Perez, P.** (2003). Gef1p, a new guanine  
607 nucleotide exchange factor for Cdc42p, regulates polarity in *Schizosaccharomyces pombe*. *Mol*  
608 *Biol Cell* **14**, 313-23.

609 **Crawford, J. M., Harden, N., Leung, T., Lim, L. and Kiehart, D. P.** (1998).  
610 Cellularization in *Drosophila melanogaster* is disrupted by the inhibition of rho activity and the  
611 activation of Cdc42 function. *Dev Biol* **204**, 151-64.

- 612 **Das, M., Drake, T., Wiley, D. J., Buchwald, P., Vavylonis, D. and Verde, F. (2012).**  
613 Oscillatory Dynamics of Cdc42 GTPase in the Control of Polarized Growth. *Science* **337**, 239-  
614 43.
- 615 **Das, M., Nunez, I., Rodriguez, M., Wiley, D. J., Rodriguez, J., Sarkeshik, A., Yates,**  
616 **J. R., 3rd, Buchwald, P. and Verde, F. (2015).** Phosphorylation-dependent inhibition of Cdc42  
617 GEF Gef1 by 14-3-3 protein Rad24 spatially regulates Cdc42 GTPase activity and oscillatory  
618 dynamics during cell morphogenesis. *Mol Biol Cell*.
- 619 **Das, M. and Verde, F. (2013).** Role of Cdc42 dynamics in the control of fission yeast  
620 cell polarization. *Biochem Soc Trans* **41**, 1745-9.
- 621 **Das, M., Wiley, D. J., Chen, X., Shah, K. and Verde, F. (2009).** The conserved NDR  
622 kinase Orb6 controls polarized cell growth by spatial regulation of the small GTPase Cdc42.  
623 *Curr Biol* **19**, 1314-9.
- 624 **de Beco, S., Vaidziulyte, K., Manzi, J., Dalier, F., di Federico, F., Cornilleau, G.,**  
625 **Dahan, M. and Coppey, M. (2018).** Optogenetic dissection of Rac1 and Cdc42 gradient  
626 shaping. *Nat Commun* **9**, 4816.
- 627 **Drubin, D. G. and Nelson, W. J. (1996).** Origins of cell polarity. *Cell* **84**, 335-44.
- 628 **Dutartre, H., Davoust, J., Gorvel, J. P. and Chavrier, P. (1996).** Cytokinesis arrest and  
629 redistribution of actin-cytoskeleton regulatory components in cells expressing the Rho GTPase  
630 CDC42Hs. *J Cell Sci* **109 ( Pt 2)**, 367-77.
- 631 **Endo, M., Shirouzu, M. and Yokoyama, S. (2003).** The Cdc42 binding and scaffolding  
632 activities of the fission yeast adaptor protein Scd2. *J Biol Chem* **278**, 843-52.
- 633 **Estravis, M., Rincon, S. and Perez, P. (2012).** Cdc42 regulation of polarized traffic in  
634 fission yeast. *Commun Integr Biol* **5**, 370-3.
- 635 **Estravis, M., Rincon, S. A., Santos, B. and Perez, P. (2011).** Cdc42 regulates multiple  
636 membrane traffic events in fission yeast. *Traffic* **12**, 1744-58.
- 637 **Etienne-Manneville, S. (2004).** Cdc42--the centre of polarity. *J Cell Sci* **117**, 1291-300.

- 638           **Guilluy, C., Garcia-Mata, R. and Burridge, K.** (2011). Rho protein crosstalk: another  
639 social network? *Trends Cell Biol* **21**, 718-26.
- 640           **Gulli, M. P., Jaquenoud, M., Shimada, Y., Niederhauser, G., Wiget, P. and Peter, M.**  
641 (2000). Phosphorylation of the Cdc42 exchange factor Cdc24 by the PAK-like kinase Cla4 may  
642 regulate polarized growth in yeast. *Mol Cell* **6**, 1155-67.
- 643           **Harris, K. P. and Tepass, U.** (2010). Cdc42 and vesicle trafficking in polarized cells.  
644 *Traffic* **11**, 1272-9.
- 645           **Heasman, S. J. and Ridley, A. J.** (2008). Mammalian Rho GTPases: new insights into  
646 their functions from in vivo studies. *Nat Rev Mol Cell Biol* **9**, 690-701.
- 647           **Howell, A. S., Jin, M., Wu, C. F., Zyla, T. R., Elston, T. C. and Lew, D. J.** (2012).  
648 Negative feedback enhances robustness in the yeast polarity establishment circuit. *Cell* **149**,  
649 322-33.
- 650           **Hwang, J. U., Gu, Y., Lee, Y. J. and Yang, Z.** (2005). Oscillatory ROP GTPase  
651 activation leads the oscillatory polarized growth of pollen tubes. *Mol Biol Cell* **16**, 5385-99.
- 652           **Irazoqui, J. E., Gladfelter, A. S. and Lew, D. J.** (2003). Scaffold-mediated symmetry  
653 breaking by Cdc42p. *Nat Cell Biol* **5**, 1062-70.
- 654           **Johnson, D. I.** (1999). Cdc42: An essential Rho-type GTPase controlling eukaryotic cell  
655 polarity. *Microbiol Mol Biol Rev* **63**, 54-105.
- 656           **Kang, P. J., Lee, M. E. and Park, H. O.** (2014). Bud3 activates Cdc42 to establish a  
657 proper growth site in budding yeast. *J Cell Biol* **206**, 19-28.
- 658           **Kelly, F. D. and Nurse, P.** (2011). Spatial control of Cdc42 activation determines cell  
659 width in fission yeast. *Mol Biol Cell* **22**, 3801-11.
- 660           **Kozubowski, L., Saito, K., Johnson, J. M., Howell, A. S., Zyla, T. R. and Lew, D. J.**  
661 (2008). Symmetry-breaking polarization driven by a Cdc42p GEF-PAK complex. *Curr Biol* **18**,  
662 1719-26.



- 663 **Kuo, C. C., Savage, N. S., Chen, H., Wu, C. F., Zyla, T. R. and Lew, D. J.** (2014).  
664 Inhibitory GEF phosphorylation provides negative feedback in the yeast polarity circuit. *Curr Biol*  
665 **24**, 753-9.
- 666 **Kutys, M. L. and Yamada, K. M.** (2014). An extracellular-matrix-specific GEF-GAP  
667 interaction regulates Rho GTPase crosstalk for 3D collagen migration. *Nat Cell Biol* **16**, 909-17.
- 668 **Machacek, M., Hodgson, L., Welch, C., Elliott, H., Pertz, O., Nalbant, P., Abell, A.,**  
669 **Johnson, G. L., Hahn, K. M. and Danuser, G.** (2009). Coordination of Rho GTPase activities  
670 during cell protrusion. *Nature* **461**, 99-103.
- 671 **Marks, J., Hagan, I. M. and Hyams, J. S.** (1986). Growth polarity and cytokinesis in  
672 fission yeast: the role of the cytoskeleton. *J Cell Sci Suppl* **5**, 229-41.
- 673 **Mitchison, J. M. and Nurse, P.** (1985). Growth in cell length in the fission yeast  
674 *Schizosaccharomyces pombe*. *J Cell Sci* **75**, 357-76.
- 675 **Moreno, S., Klar, A. and Nurse, P.** (1991). Molecular genetic analysis of fission yeast  
676 *Schizosaccharomyces pombe*. *Methods in enzymology* **194**, 795-823.
- 677 **Mutavchiev, D. R., Leda, M. and Sawin, K. E.** (2016). Remodeling of the Fission Yeast  
678 Cdc42 Cell-Polarity Module via the Sty1 p38 Stress-Activated Protein Kinase Pathway. *Curr Biol*  
679 **26**, 2921-2928.
- 680 **Nabeshima, K., Nakagawa, T., Straight, A. F., Murray, A., Chikashige, Y.,**  
681 **Yamashita, Y. M., Hiraoka, Y. and Yanagida, M.** (1998). Dynamics of centromeres during  
682 metaphase-anaphase transition in fission yeast: Dis1 is implicated in force balance in  
683 metaphase bipolar spindle. *Mol Biol Cell* **9**, 3211-25.
- 684 **Nance, J. and Zallen, J. A.** (2011). Elaborating polarity: PAR proteins and the  
685 cytoskeleton. *Development* **138**, 799-809.
- 686 **Onishi, M., Ko, N., Nishihama, R. and Pringle, J. R.** (2013). Distinct roles of Rho1,  
687 Cdc42, and Cyk3 in septum formation and abscission during yeast cytokinesis. *J Cell Biol* **202**,  
688 311-29.
- 689 **Pollard, T. D.** (2010). Mechanics of cytokinesis in eukaryotes. *Curr Opin Cell Biol* **22**,  
690 50-6.

- 691 **Rapali, P., Mitteau, R., Braun, C., Massoni-Laporte, A., Unlu, C., Bataille, L.,**  
692 **Arramon, F. S., Gygi, S. P. and McCusker, D.** (2017). Scaffold-mediated gating of Cdc42  
693 signalling flux. *Elife* **6**.
- 694 **Ridley, A. J.** (2006). Rho GTPases and actin dynamics in membrane protrusions and  
695 vesicle trafficking. *Trends Cell Biol* **16**, 522-9.
- 696 **Ridley, A. J.** (2015). Rho GTPase signalling in cell migration. *Curr Opin Cell Biol* **36**,  
697 103-12.
- 698 **Slaughter, B. D., Das, A., Schwartz, J. W., Rubinstein, B. and Li, R.** (2009a). Dual  
699 modes of cdc42 recycling fine-tune polarized morphogenesis. *Dev Cell* **17**, 823-35.
- 700 **Slaughter, B. D., Smith, S. E. and Li, R.** (2009b). Symmetry breaking in the life cycle of  
701 the budding yeast. *Cold Spring Harbor Perspect Biol* **1**, a003384.
- 702 **Sloat, B. F., Adams, A. and Pringle, J. R.** (1981). Roles of the CDC24 gene product in  
703 cellular morphogenesis during the *Saccharomyces cerevisiae* cell cycle. *J Cell Biol* **89**, 395-405.
- 704 **Sloat, B. F. and Pringle, J. R.** (1978). A mutant of yeast defective in cellular  
705 morphogenesis. *Science* **200**, 1171-3.
- 706 **Tay, Y. D., Leda, M., Goryachev, A. B. and Sawin, K. E.** (2018). Local and global  
707 Cdc42 guanine nucleotide exchange factors for fission yeast cell polarity are coordinated by  
708 microtubules and the Tea1-Tea4-Pom1 axis. *J Cell Sci* **131**.
- 709 **Verde, F., Wiley, D. J. and Nurse, P.** (1998). Fission yeast orb6, a ser/thr protein  
710 kinase related to mammalian rho kinase and myotonic dystrophy kinase, is required for  
711 maintenance of cell polarity and coordinates cell morphogenesis with the cell cycle. *Proc Natl*  
712 *Acad Sci U S A* **95**, 7526-31.
- 713 **Warner, S. J. and Longmore, G. D.** (2009). Cdc42 antagonizes Rho1 activity at  
714 adherens junctions to limit epithelial cell apical tension. *J Cell Biol* **187**, 119-33.
- 715 **Wedlich-Soldner, R., Wai, S. C., Schmidt, T. and Li, R.** (2004). Robust cell polarity is  
716 a dynamic state established by coupling transport and GTPase signaling. *J Cell Biol* **166**, 889-  
717 900.

718           **Wei, B., Hercyk, B. S., Mattson, N., Mohammadi, A., Rich, J., DeBruyne, E., Clark,**  
719 **M. M. and Das, M.** (2016). Unique Spatiotemporal Activation Pattern of Cdc42 by Gef1 and  
720 Scd1 Promotes Different Events during Cytokinesis. *Mol Biol Cell* **27**, 1235-45.

721           **Wheatley, E. and Rittinger, K.** (2005). Interactions between Cdc42 and the scaffold  
722 protein Scd2: requirement of SH3 domains for GTPase binding. *Biochem J* **388**, 177-84.

723           **Wu, C. F. and Lew, D. J.** (2013). Beyond symmetry-breaking: competition and negative  
724 feedback in GTPase regulation. *Trends Cell Biol* **23**, 476-83.

725           **Wu, J. Q., Kuhn, J. R., Kovar, D. R. and Pollard, T. D.** (2003). Spatial and temporal  
726 pathway for assembly and constriction of the contractile ring in fission yeast cytokinesis. *Dev*  
727 *Cell* **5**, 723-34.

728           **Yang, H. W., Collins, S. R. and Meyer, T.** (2016). Locally excitable Cdc42 signals steer  
729 cells during chemotaxis. *Nat Cell Biol* **18**, 191-201.

730

731

732 **FIGURE LEGENDS**

733 **Figure 1: Gef1 promotes bipolar growth via new-end-take-off. (A)** Polarized growth  
734 phenotypes of calcofluor stained *cdc10+* and *cdc10-129* cells grown at 36°C. *cdc10+* cells  
735 initiate bipolar growth, while *cdc10-129* cells arrest at G1-phase and remain monopolar. Red  
736 asterisks mark cells that exhibit monopolar growth. **(B)** Wild-type cells predominately display old  
737 end growth followed by a delayed onset of new-end growth. **(C) i.** In *gef1Δ*, 68% of monopolar  
738 cells yield a monopolar daughter cell from the end that grew in the previous generation and a  
739 bipolar daughter cell from the end that failed to grow in the previous generation. **ii.** 18% of  
740 monopolar cells yield two monopolar cells. **iii.** 6% of monopolar cells yield two monopolar cells.  
741 Circled numbers describe the order of growth. Arrows correspond to direction of growth. **(D)**  
742 Quantification of cell growth pattern in *gef1+* and *gef1Δ* cells. NETO- new end take off, Scale  
743 bar = 5μm.

744

745 **Figure 2: Gef1 promotes localization of polarity factors Scd1 and Scd2 to the new end.**  
746 **(A)** Scd2-GFP and Scd1-3xGFP localization to the sites of polarized growth in *gef1+* and *gef1Δ*  
747 cells. Red arrows indicate the new ends of monopolar cells that do not recruit Scd2-GFP or  
748 Scd1-3xGFP. **(B)** Quantifications of bipolar Scd1-3xGFP and Scd2-GFP localization in the  
749 indicated genotypes. Significance determined by one-way ANOVA with Tukey's multiple  
750 comparisons post hoc test (\*\*\*\*,  $p < 0.0001$ ). **(C)** Scd1-3xGFP localization in *gef1+* and *gef1Δ*  
751 cells expressing the ring and SPB markers Rlc1-tdTomato and Sad1-mCherry respectively.  
752 Arrowheads label cells with Scd1-3xGFP localized to the division site, while arrows mark cells  
753 with constricting rings that lack Scd1-3xGFP at the division site. **(D and E)** Quantification of  
754 Scd1-3xGFP localization to and intensity at constricting rings in the indicated genotypes.  
755 Reported p values from Student's t-tests. All data points are plotted in each graph, with black  
756 bars on top of data points that show the mean and standard deviation for each genotype. All  
757 images are inverted max projections with the exception of bright field. CDS, Cell division site.  
758 Scale bar = 5μm.

759

760 **Figure 3: Gef1-mediated Cdc42 activation recruits Scd1 to the division site. (A)** CRIB-  
761 3xGFP localization to the division site in *gef1+* and *gef1Δ* cells transformed with the control  
762 vector *pJK148* or *cdc42G12V*. Red arrows indicate cells with reduced Cdc42 activity at the  
763 division site in control *gef1Δ* cells, while red arrowheads indicate restored Cdc42 activity at the  
764 division site in *gef1Δ* cells expressing *cdc42G12V*. **(B)** Quantification of CRIB-3xGFP intensity

765 at the cell division site (CDS) in the indicated genotypes (\*\*\*\*,  $p < 0.0001$ ). **(C)** Scd1-tdTomato  
766 localization to constricting rings marked by Rlc1-GFP in *gef1+* and *gef1Δ* cells transformed with  
767 the control vector *pJK148* or *cdc42G12V*. Red arrows indicate cells with constricting rings  
768 lacking Scd1-tdTomato in control *gef1Δ* cells, while red arrowheads indicate restored Scd1-  
769 tdTomato at the constricting rings of *gef1Δ* cells expressing *cdc42G12V*. **(D)** Quantification of  
770 cells with Scd1-tdTomato at the constricting rings of cells of the indicated genotypes (\*\*\*\*,  
771  $p < 0.0001$ ). All data points are plotted in each graph, with black bars on top of data points that  
772 show the mean and standard deviation for each genotype. All images are inverted max  
773 projections. Significance determined by one-way ANOVA with Tukey's multiple comparisons  
774 post hoc test. Scale bars = 5μm.

775

776 **Figure 4: Gef1 promotes Scd1 and Scd2 localization to the division site. (A)** Scd2-GFP  
777 localization in *gef1+* and *gef1Δ* cells expressing the ring and SPB markers Rlc1-tdTomato and  
778 Sad1-mCherry. Arrowheads label cells with Scd2-GFP localized to constricting rings, while arrows  
779 mark cells with assembled rings that lack Scd2-GFP at the division site. **(B and C)** Quantification  
780 of Scd2-GFP localization and intensity in the indicated genotypes. All data points are plotted in  
781 each graph, with black bars on top of data points that show the mean and standard deviation for  
782 each genotype. All images are inverted max projections with the exception of bright field.  
783 Significance determined by student's t-test. **(D)** Scd2-GFP localization to the division site in *scd1+*  
784 and *scd1Δ* cells. **(E)** Scd1-3xGFP localization in *scd2+* and *scd2Δ* cells. Division site marked by  
785 black arrows in the bright field images. Scd1-3xGFP localization to the division site indicated by  
786 red arrowheads. Red arrows show absence of Scd1-3xGFP at the division site. All images are  
787 inverted max projections with the exception of bright field. Scale bar = 5μm.

788

789 **Figure 5: Temporal localization of Gef1, Scd2, and Scd1 to the site of cell division. (A)**  
790 Representative images showing the localizations of Gef1-mNG, Scd2-GFP, and Scd1-3xGFP  
791 (top panels) as a function of spindle pole body distance (bottom panels). The range of SPB  
792 distance is listed for each column. Green arrows indicate the earliest time point at which signal is  
793 visible. Red arrowheads indicate time points prior to localization. **(B)** Quantification of Gef1, Scd2,  
794 and Scd1 localization to the division site in a temporal manner, showing the means of the distance  
795 between spindle poles of the first 33<sup>rd</sup> percentile of early anaphase cells at which signal first  
796 appears (grey circles, Significance determined by one-way ANOVA with Tukey's multiple  
797 comparisons post hoc test. \*\*,  $p = 0.005$ ). Second and third percentiles shown in red circles and

798 grey hollows, respectively. **(C)** Representative images of early anaphase cells expressing  
799 combinations of Scd1-3xGFP, Gef1-tdTomato, Scd2-GFP, and Scd1-tdTomato. Co-localization  
800 is marked by green arrow, and red arrows mark sites with only one kind of protein **(D)** Table  
801 summarizing the order in which Gef1, Scd2, and Scd1 localize to the division site. All data points  
802 are plotted in each graph, with black bars on top of data points that show the mean and standard  
803 deviation for each genotype. All images are inverted max projections. Scale bars = 5 $\mu$ m. CDS,  
804 Cell Division Site.  
805

806 **Figure 6: Gef1 promotes Scd1 localization to the new end. (A)** CRIB-3xGFP and Scd1-  
807 tdTomato localization at cell tips, and restoration of bipolar growth in *gef1+* and *gef1 $\Delta$*  cells  
808 transformed with the control vector *pJK148* or *cdc42G12V*. Red asterisk indicate the new end of  
809 monopolar cells. **(B and C)** Quantification of the percent of cells that exhibit bipolar CRIB-  
810 3xGFP and Scd1-tdTomato localization at cell tips in the indicated genotypes (Significance  
811 determined by one-way ANOVA with Tukey's multiple comparisons post hoc test. \*\*\*,  $p < 0.001$ ,  
812 \*\*\*\*,  $p < 0.0001$ ). All data points are plotted in each graph, with black bars on top of data points  
813 that show the mean and standard deviation for each genotype. All images are inverted max  
814 projections. **(D)** Localization of Gef1-tdTomato and Scd2-GFP in DMSO or LatA treated cells. **(E)**  
815 Localization of Scd2-GFP in *gef1+* and *gef1 $\Delta$*  cells treated with DMSO or LatA. All images are  
816 inverted max projections with the exception of bright field unless specified. Scale bar = 5 $\mu$ m.  
817

818 **Figure 7: Scd1 and actin prevent ectopic Gef1 localization to promote polarized growth,**  
819 **and promote Gef1 removal from the division site after ring constriction. (A)** Gef1-mNG  
820 localization in *scd1+* and *scd1 $\Delta$*  cells grown in yeast extract (YE, top panel) or treated with  
821 DMSO (middle panel) or 10 $\mu$ M LatA (bottom panel). **(B)** CRIB-3xGFP localization in *gef1+* and  
822 *gef1 $\Delta$*  cells treated with DMSO (top panel) or 10 $\mu$ M LatA (bottom panel). Arrowheads indicate  
823 cells with CRIB-3xGFP or Gef1-mNG localized to regions of polarized growth. Arrows indicate  
824 cells with CRIB-3xGFP or Gef1-mNG localized to non-polarized regions on the cell cortex.  
825 Images in (A) and (B) are inverted max projections of the medial 4-7 cell slices. **(C)** Gef1-mNG  
826 localization to the division site after ring disassembly in *scd1+* and *scd1 $\Delta$*  cells expressing the  
827 ring and SPB markers Rlc1-tdTomato and Sad1-mCherry. Black arrowheads mark the  
828 membrane barrier in cells post-ring disassembly. Red arrowheads mark cells post-ring  
829 disassembly that lack Gef1-mNG at the membrane barrier. Red arrows mark cells with Gef1-  
830 mNG localized to the membrane barrier post-ring assembly. **(D)** Quantification of Gef1 lingering

831 at the division site in *scd1+* and *scd1Δ* cells (\*\*\*\*,  $p < 0.0001$ , student's t-test). **(E)** Gef1-mNG  
832 localization in septated cells expressing the ring and SPB markers Rlc1-tdTomato and Sad1-  
833 mCherry, treated with either DMSO, 10 $\mu$ M LatA, or 100 $\mu$ M CK666. Red arrowheads mark cells  
834 post-ring disassembly that lack Gef1-mNG at the membrane barrier. Red arrows indicate cells  
835 with Gef1-mNG localized to the membrane barrier post-ring assembly. Red arrowheads indicate  
836 cells with absence of Gef1-mNG to the membrane barrier. **(F)** Quantification of Gef1 lingering at  
837 the division site in septated *scd1+* and *scd1Δ* cells treated with 10 $\mu$ M LatA or DMSO (\*,  $p < 0.05$ .  
838 \*\*,  $p < 0.01$ , one-way ANOVA with Tukey's multiple comparisons post hoc test). All data points  
839 are plotted in each graph, with black bars on top of data points that show the mean and  
840 standard deviation for each genotype. All images are inverted max projections unless specified.  
841 Scale bars = 5 $\mu$ m. CDS, Cell Division Site.

842

843 **Figure 8: Model of the crosstalk between Gef1 and Scd1 that promotes polarized bipolar**  
844 **growth. (A)** Diagram of the crosstalk pathway between Gef1 and Scd1. Solid arrows indicate an  
845 activating or promoting relationship in the direction of the arrow. Red terminating arrow indicates  
846 inactivation or removal of the protein at the arrows terminus. Dashed arrows indicate that the  
847 mechanism that regulates the proteins to which these arrows point is not yet resolved. **(B)**  
848 Schematic depicting the sequential localization of Gef1, Scd2, and Scd1 to the division site during  
849 cytokinesis. At the division site Gef1 localizes first and promotes Scd2 localization. Scd2 at the  
850 division site then recruits Scd1. **(C)** Schematic illustrating the crosstalk between Gef1 and Scd1  
851 that promotes bipolar growth and regulates cell shape. In wild type (WT) cells, Gef1 activates  
852 Cdc42 which then recruits Scd2 to the new end, leading to Scd1 recruitment thus enabling NETO.  
853 In *scd1Δ* cells Gef1 localization is no longer restricted to the cell ends leading to ectopic Cdc42  
854 activation and loss of polarity.

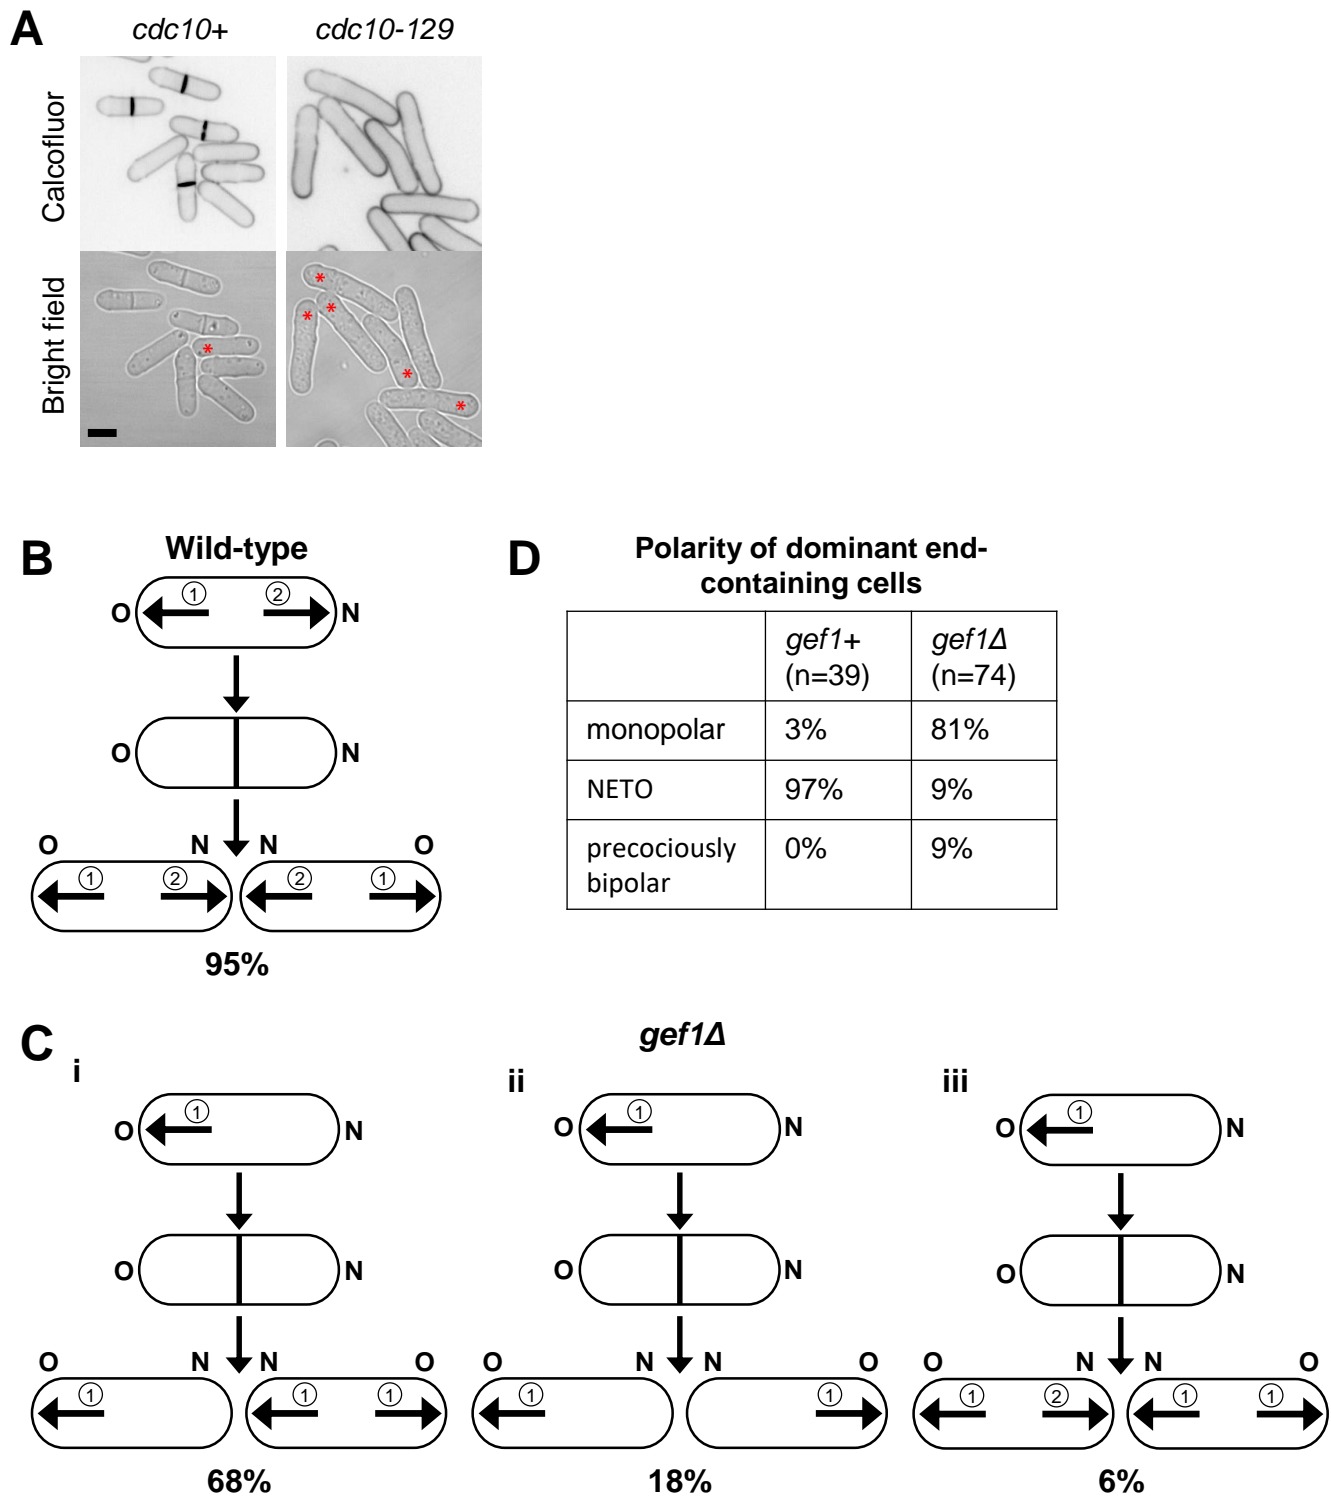

Figure 1



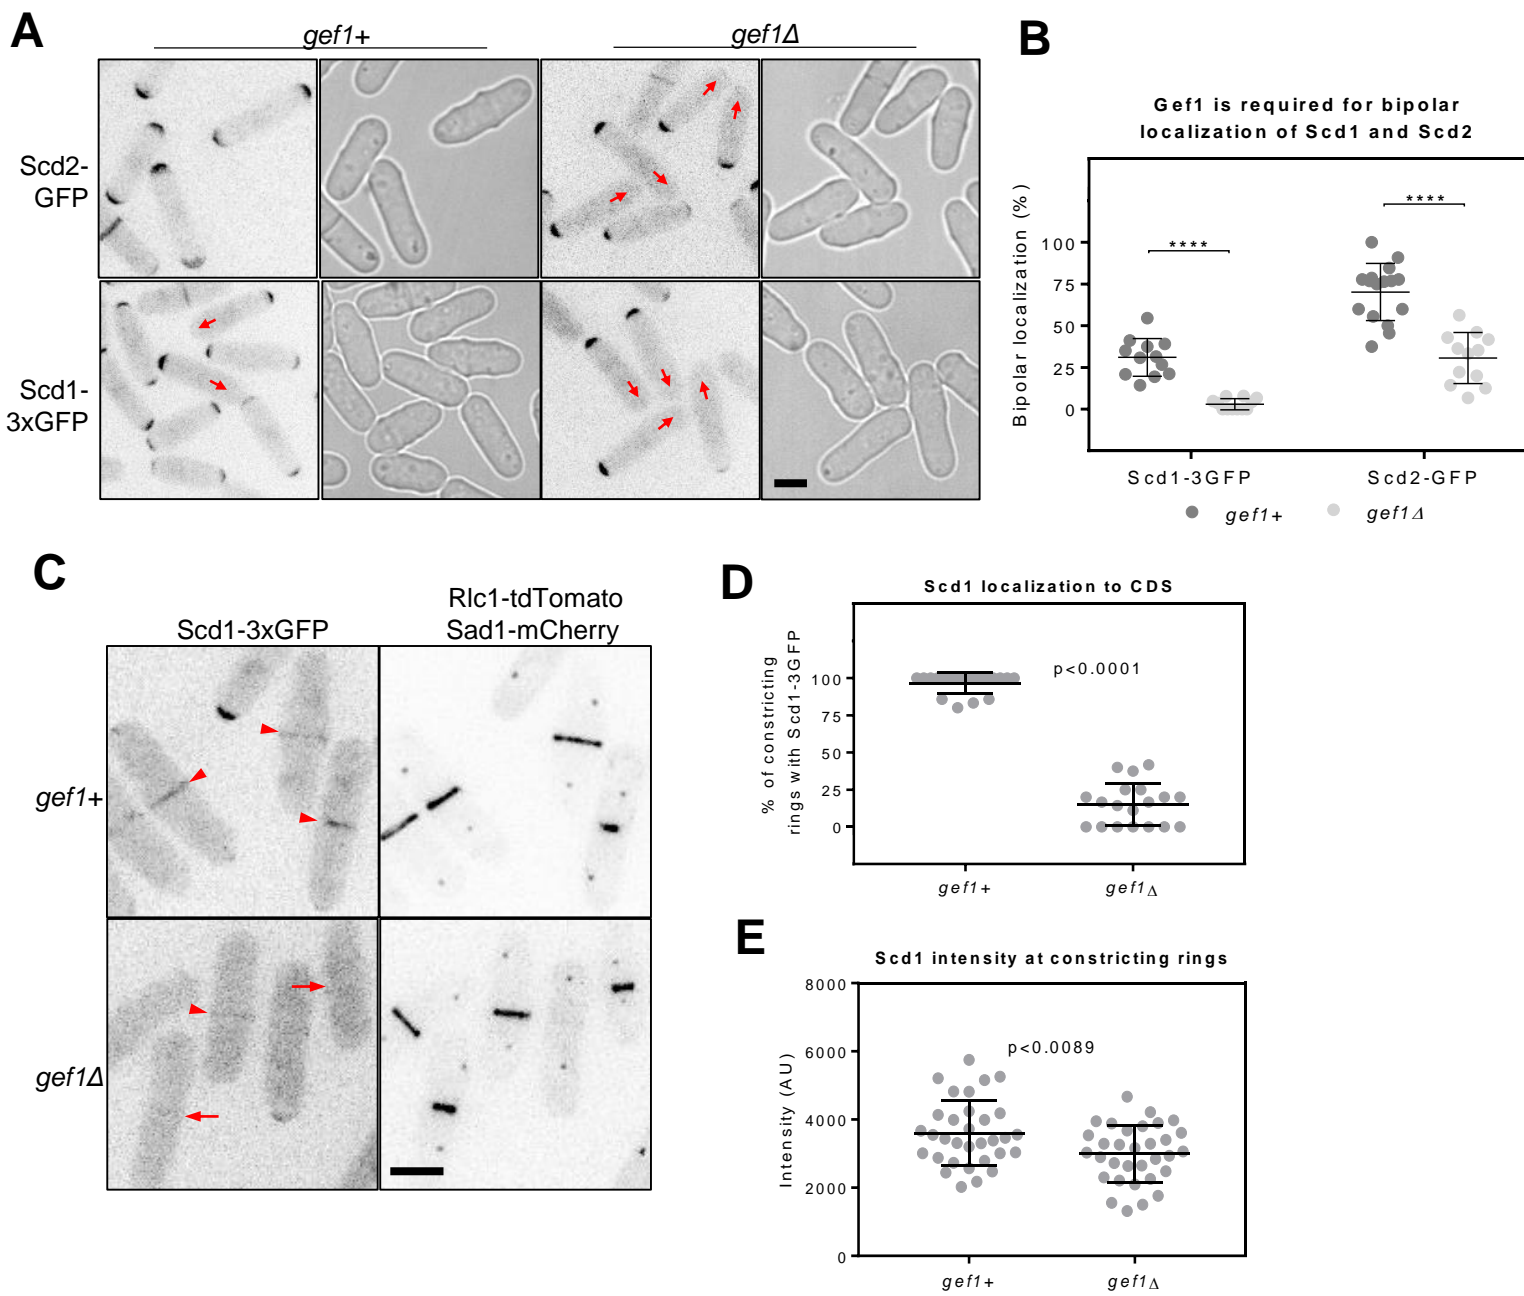

**Figure 2**

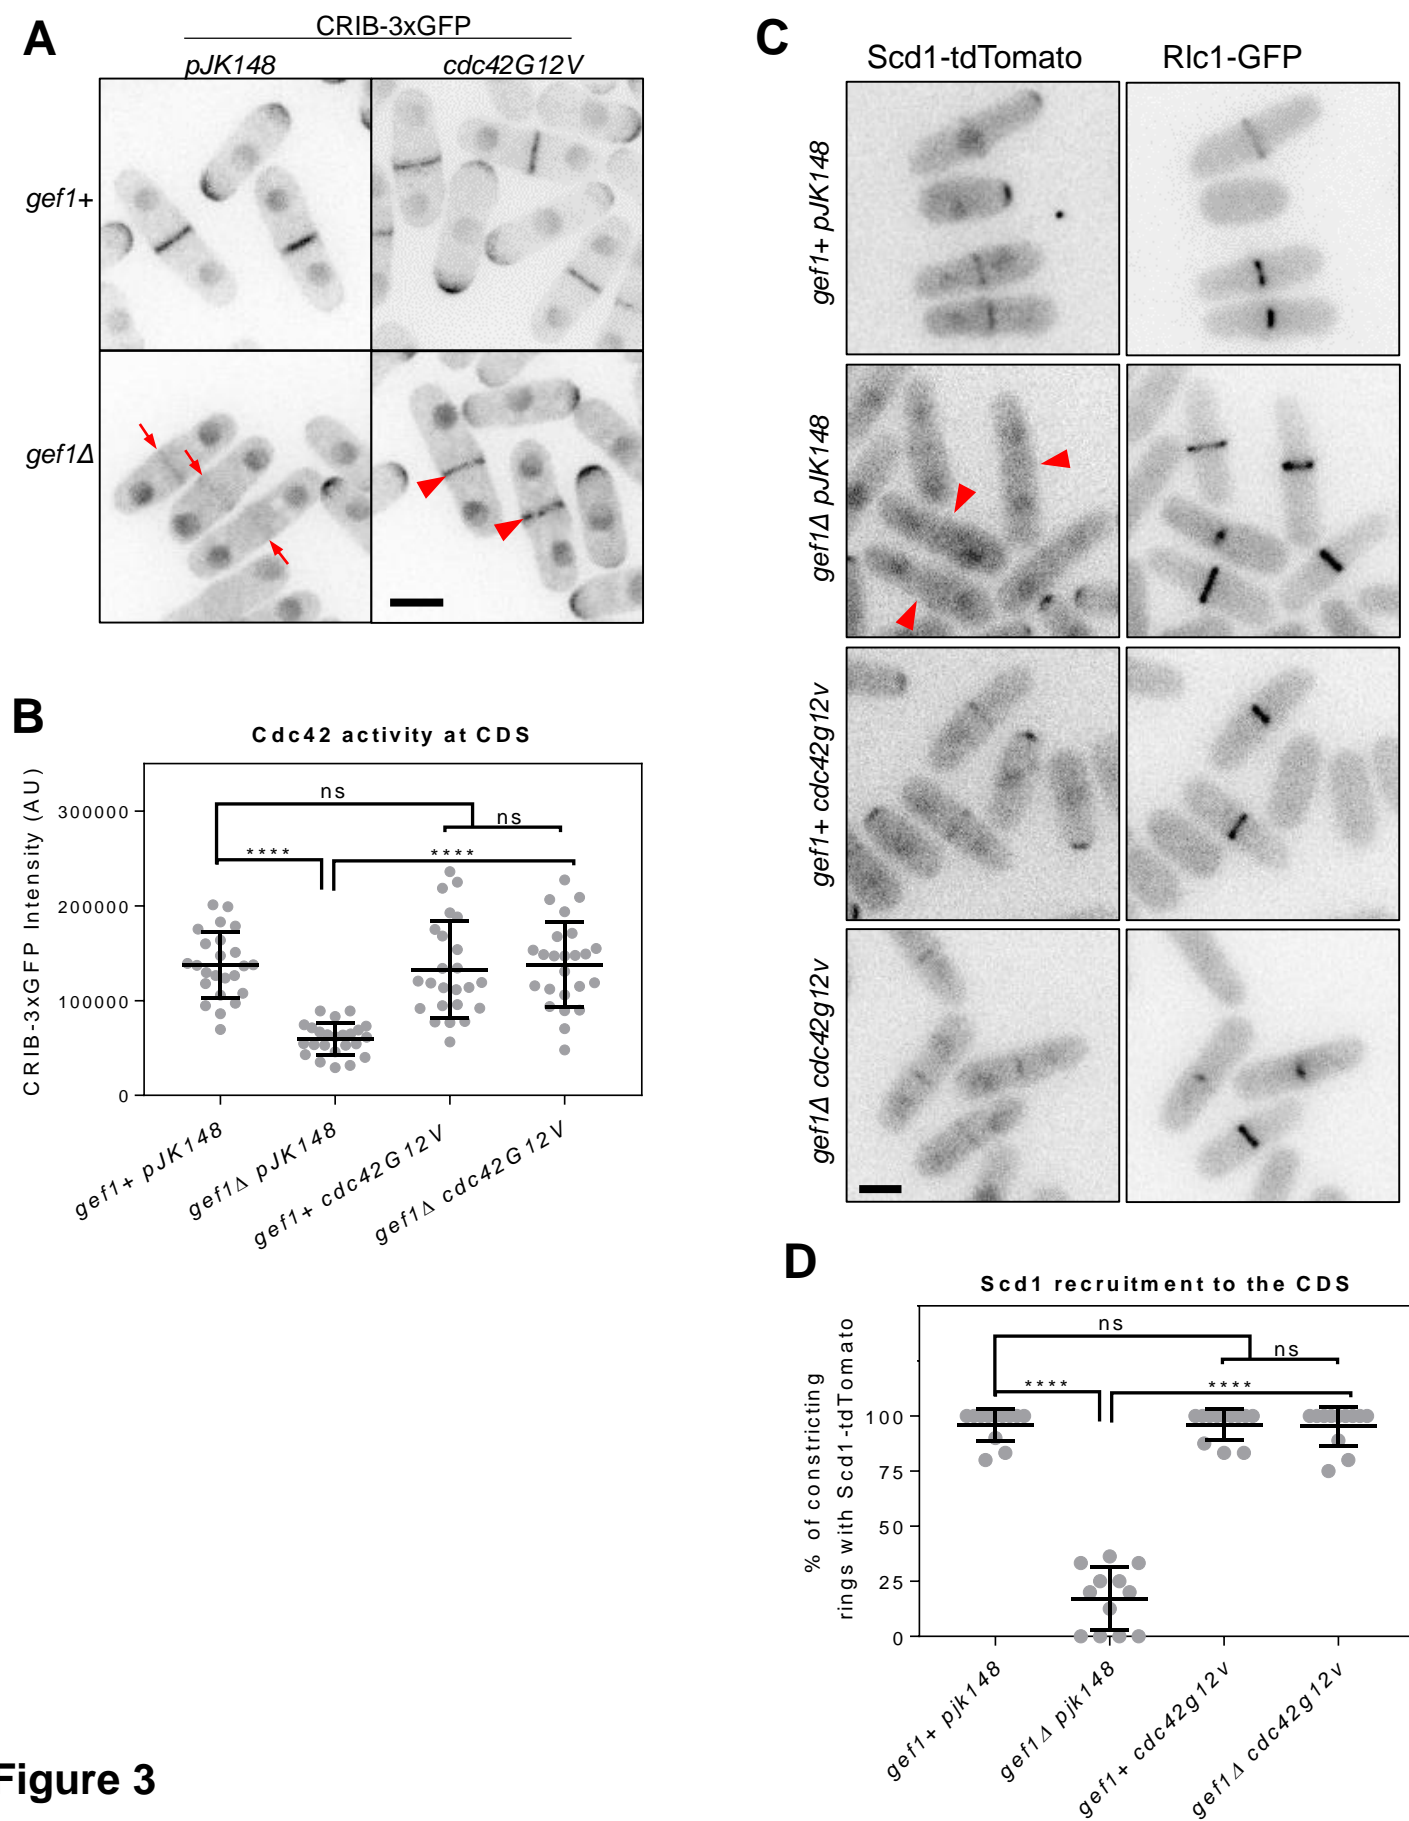

**Figure 3**

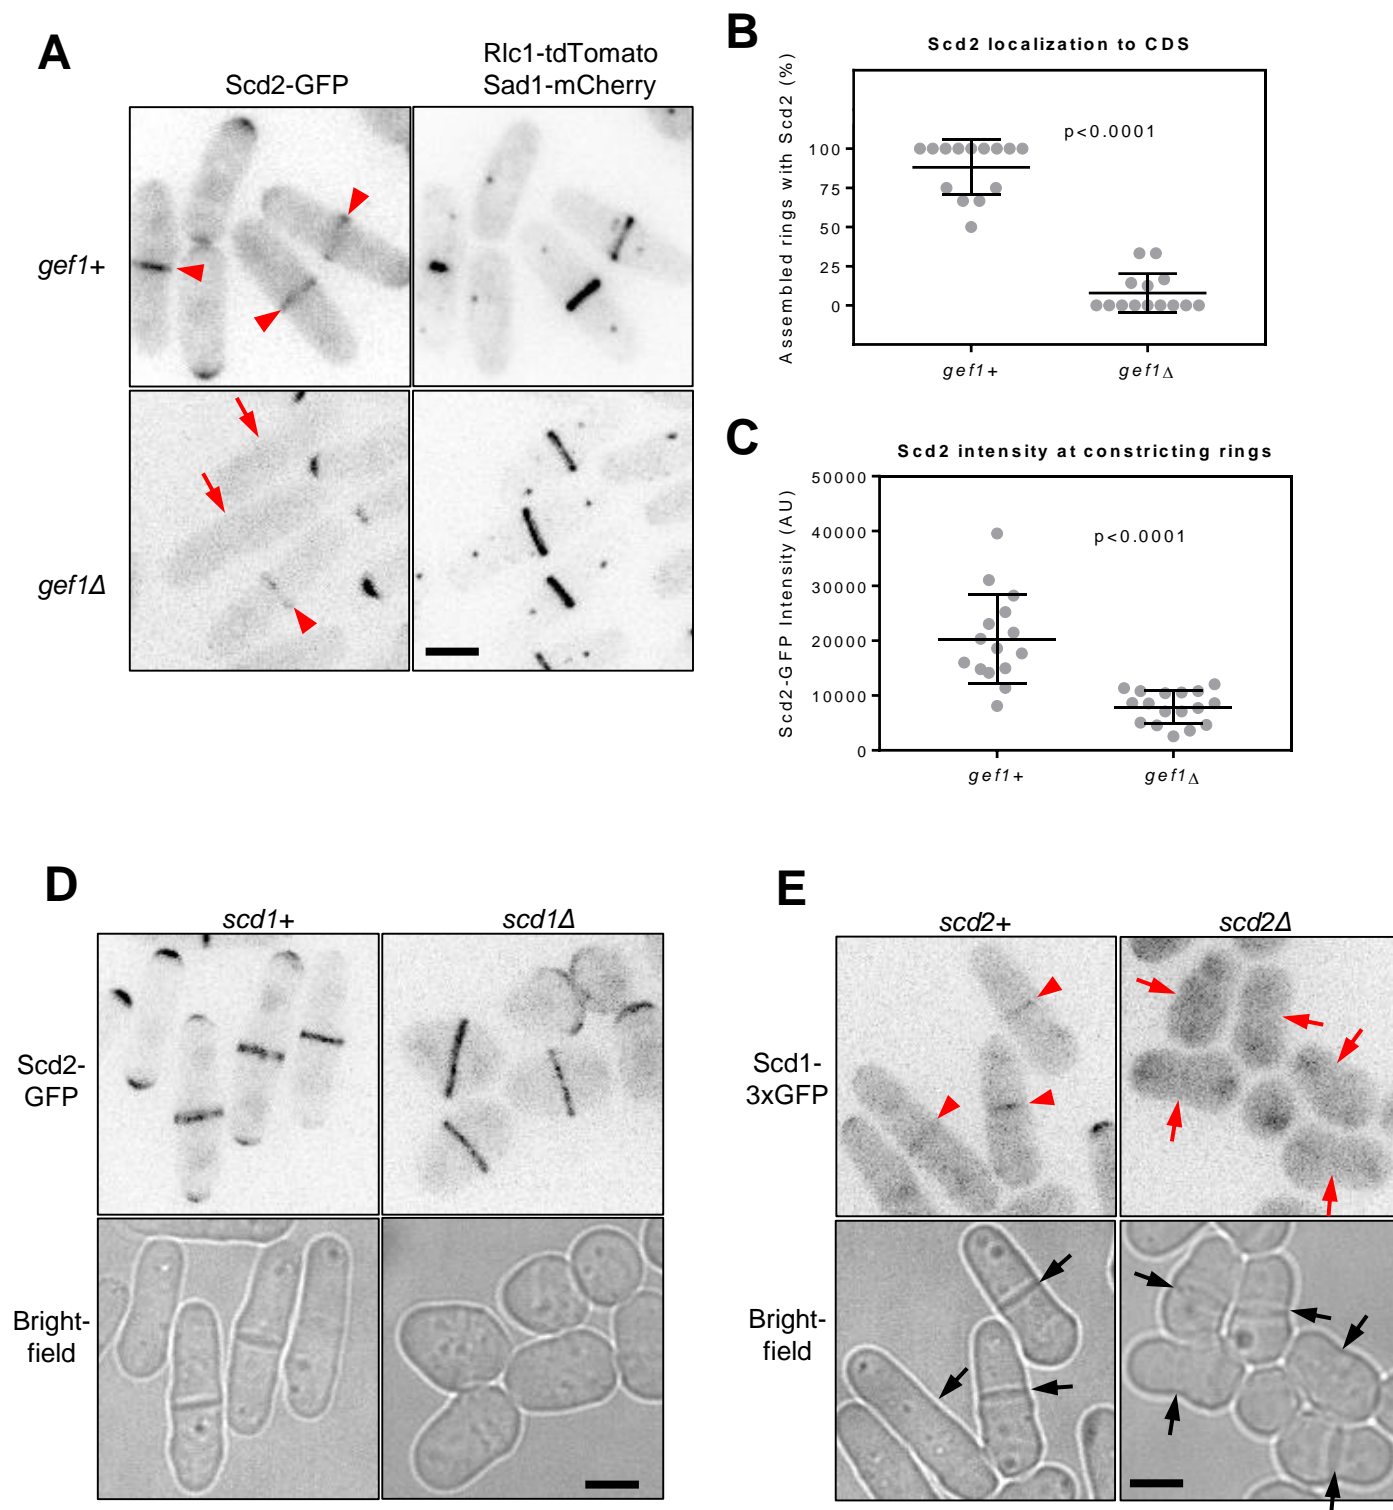

**Figure 4**

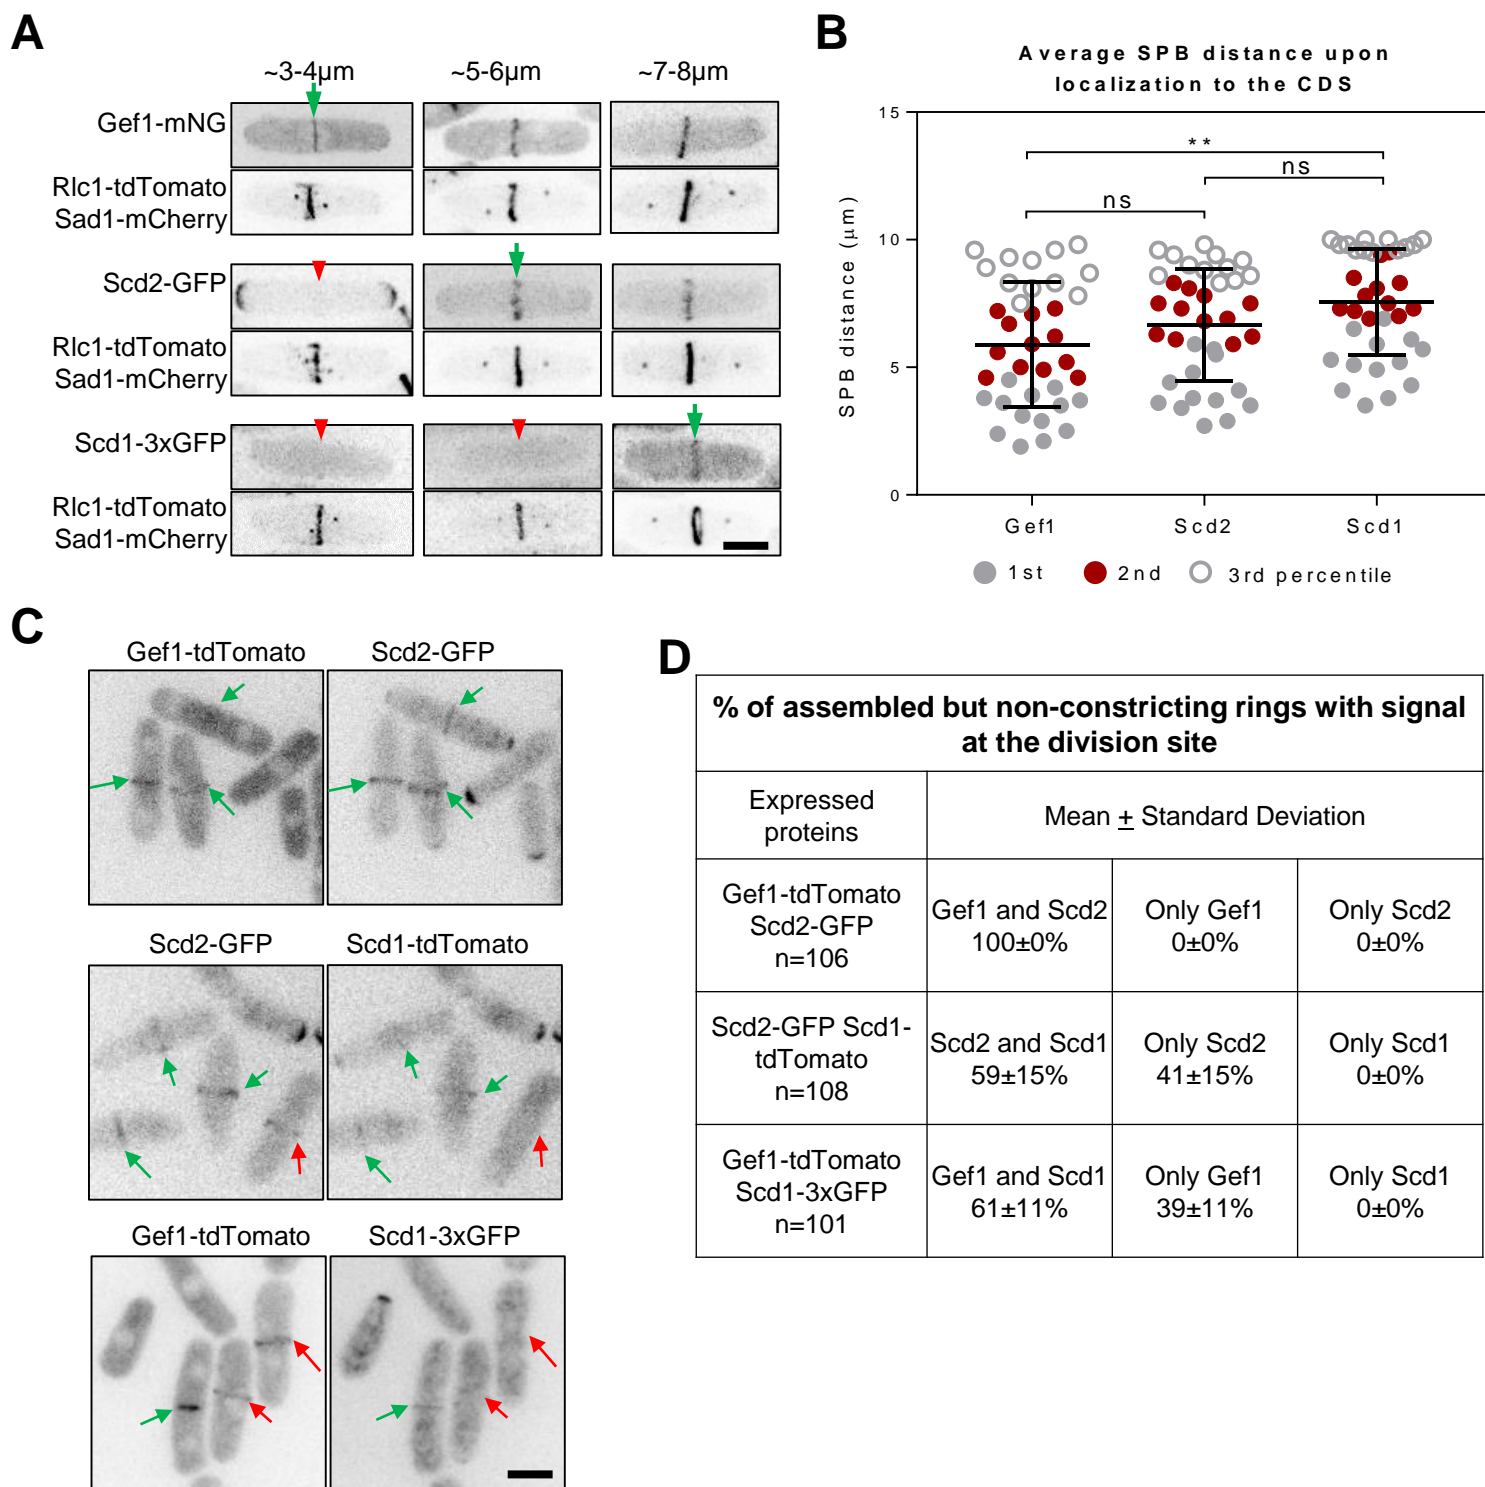

**Figure 5**

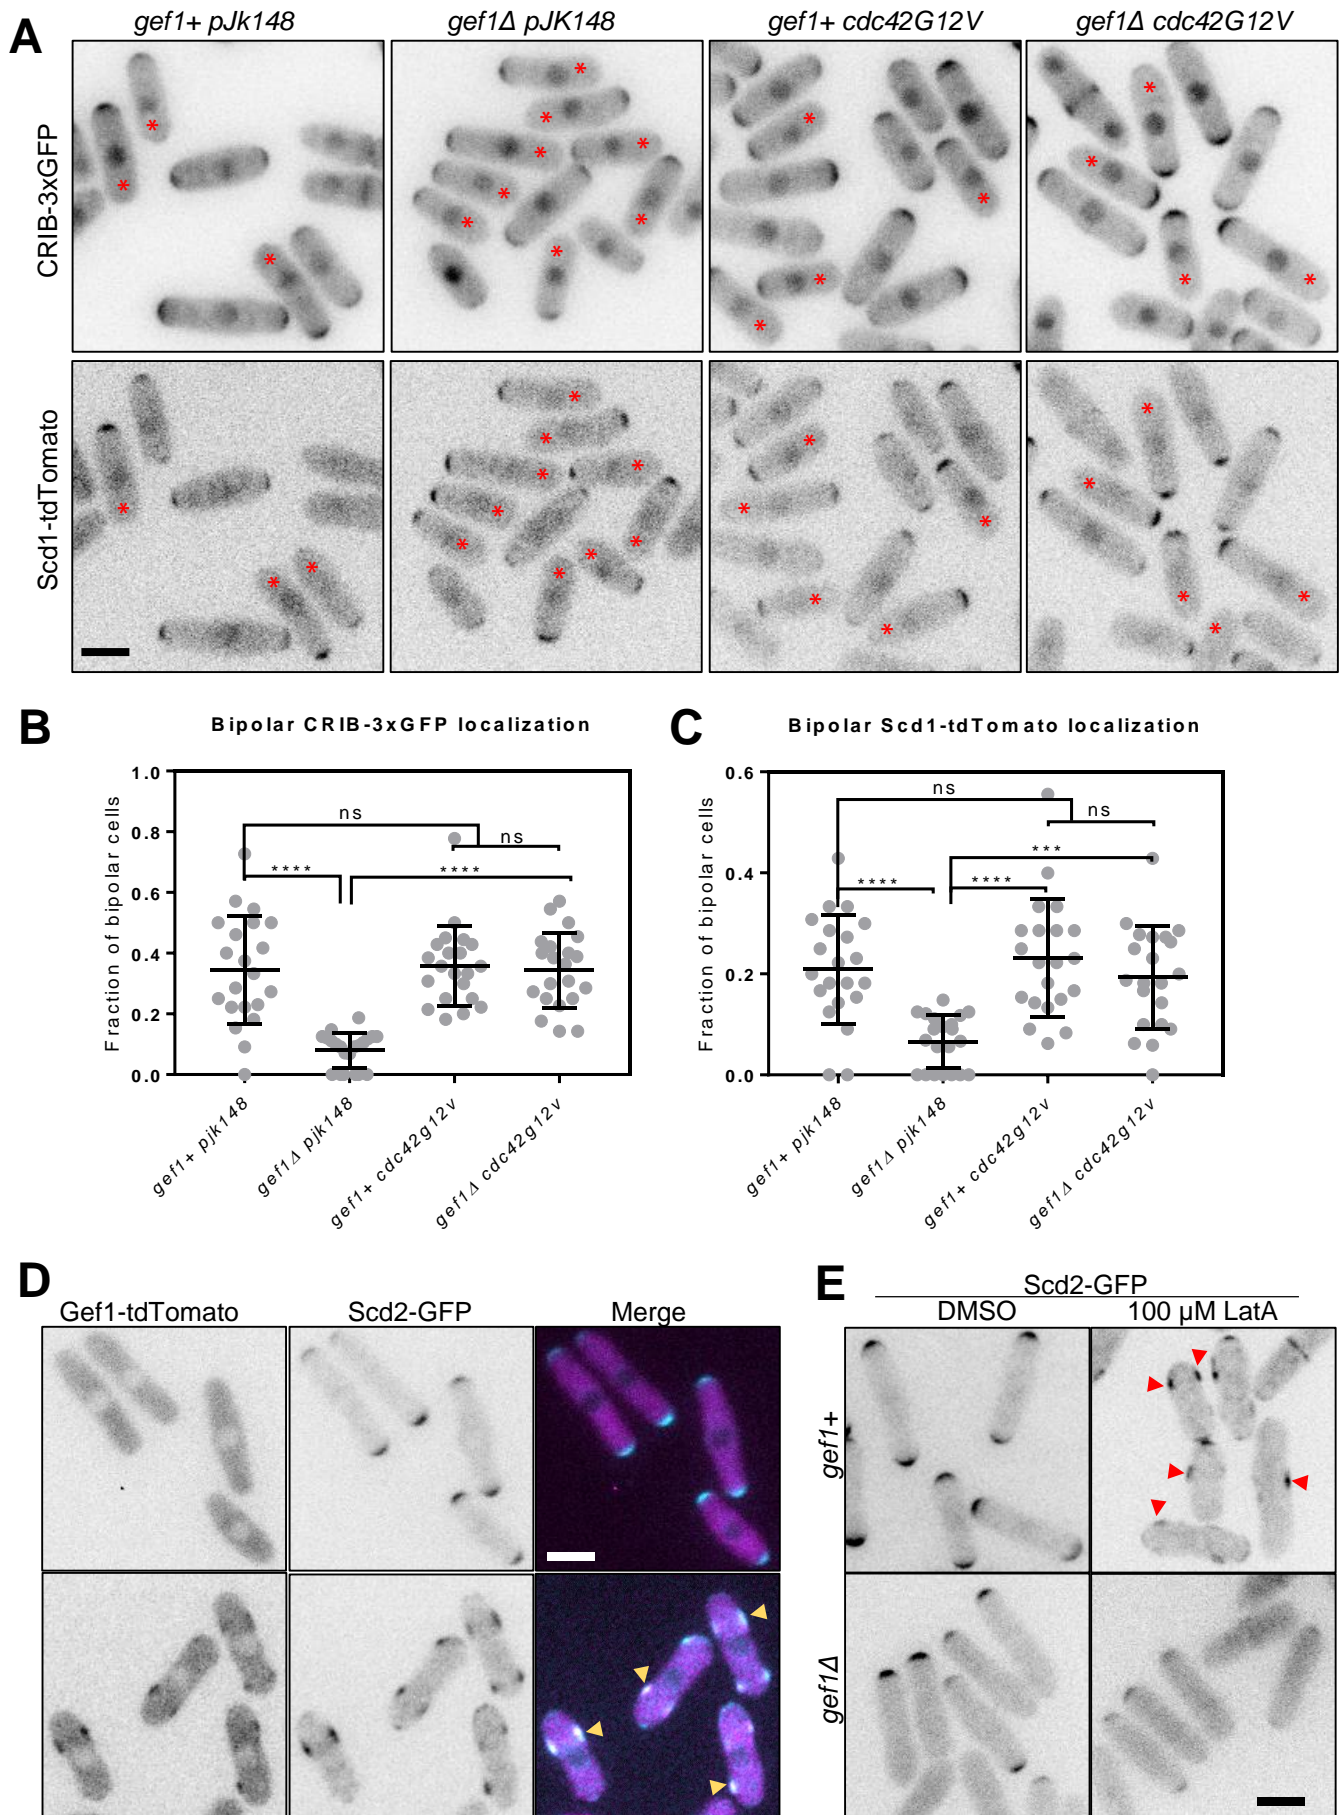

**Figure 6**

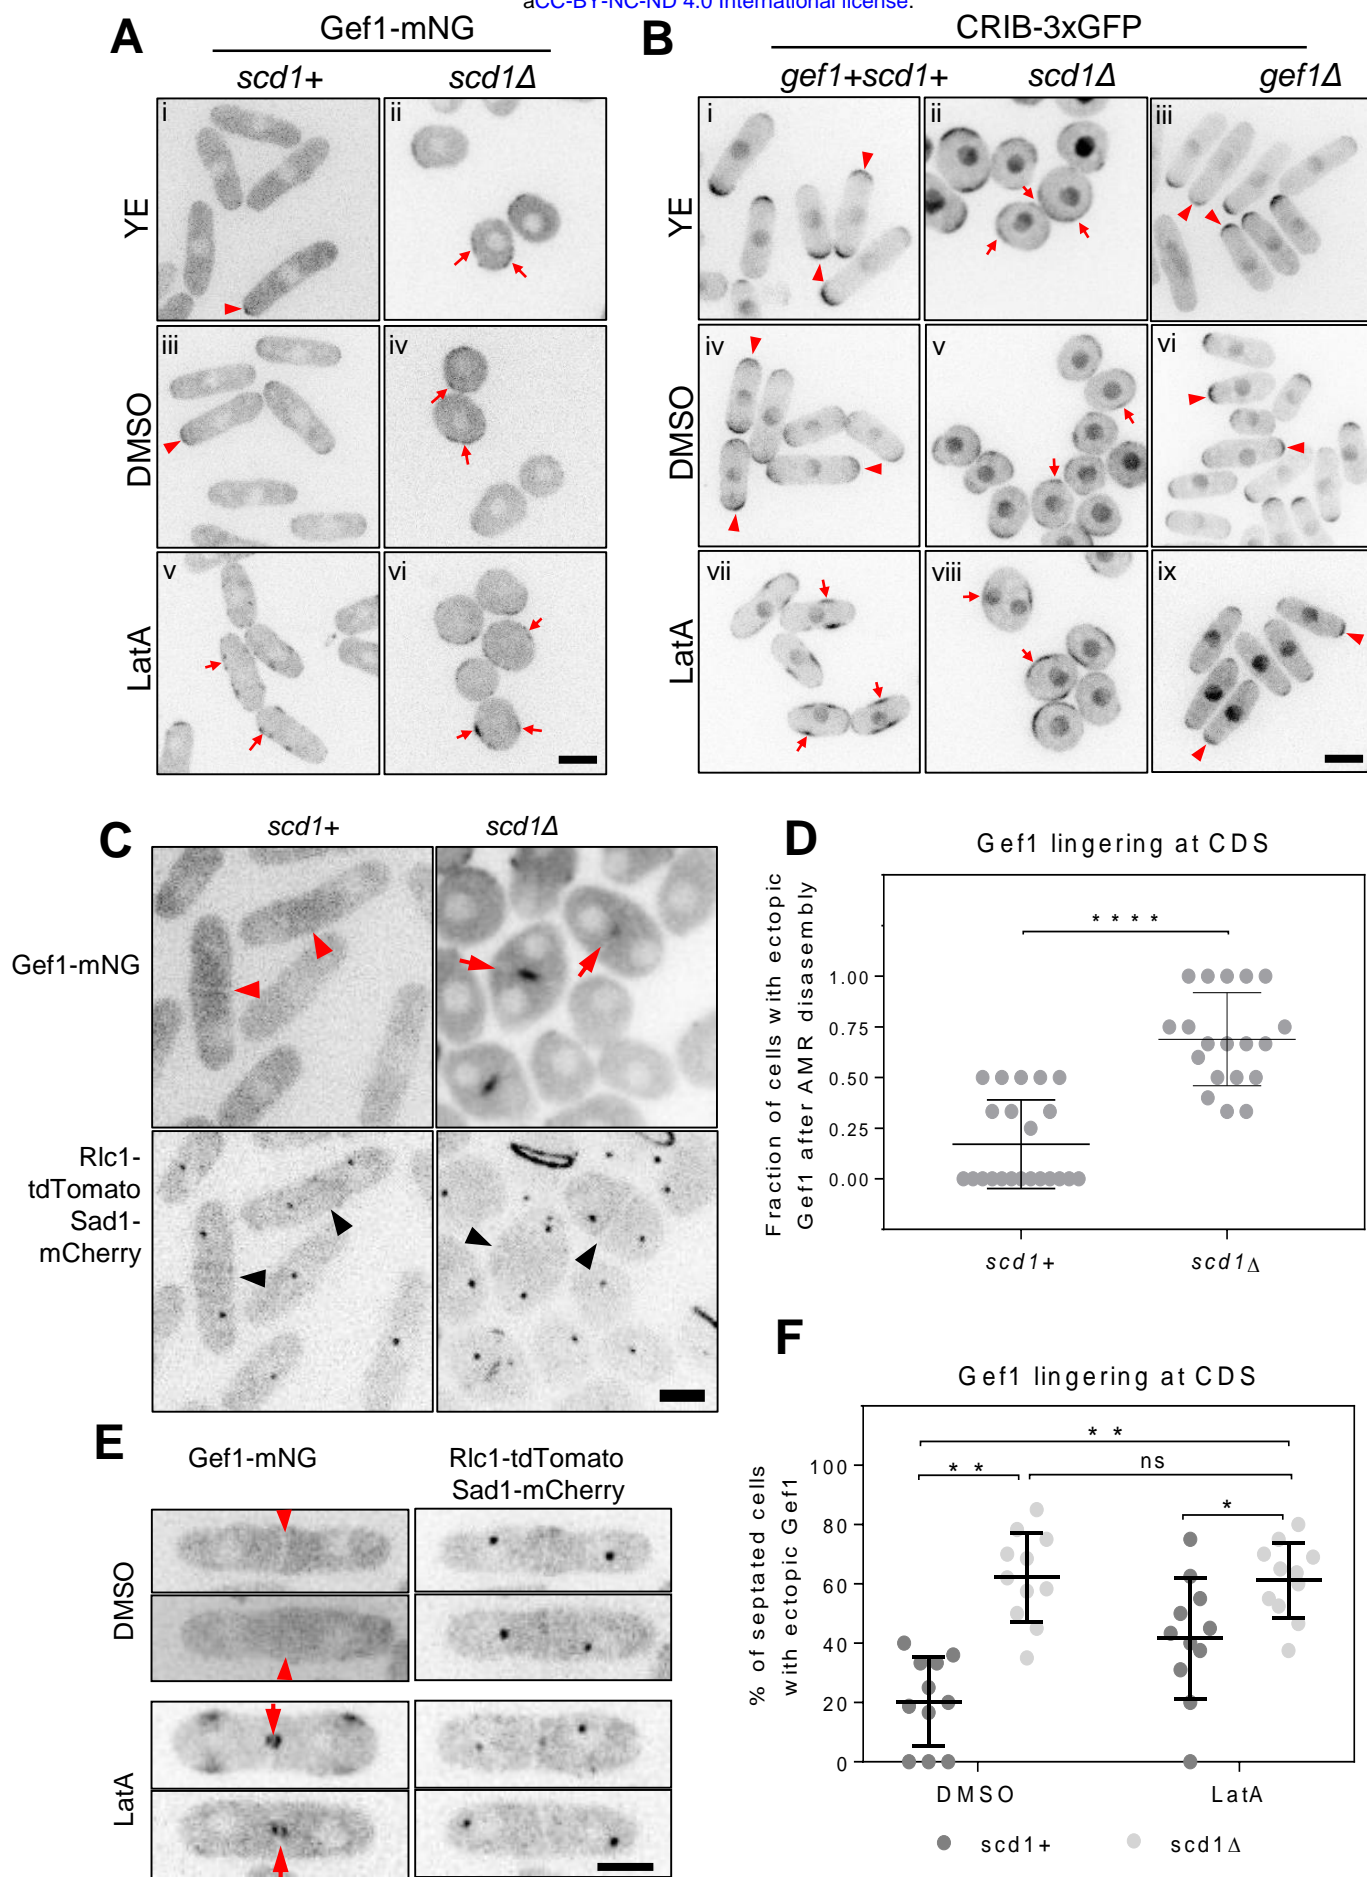

**Figure 7**

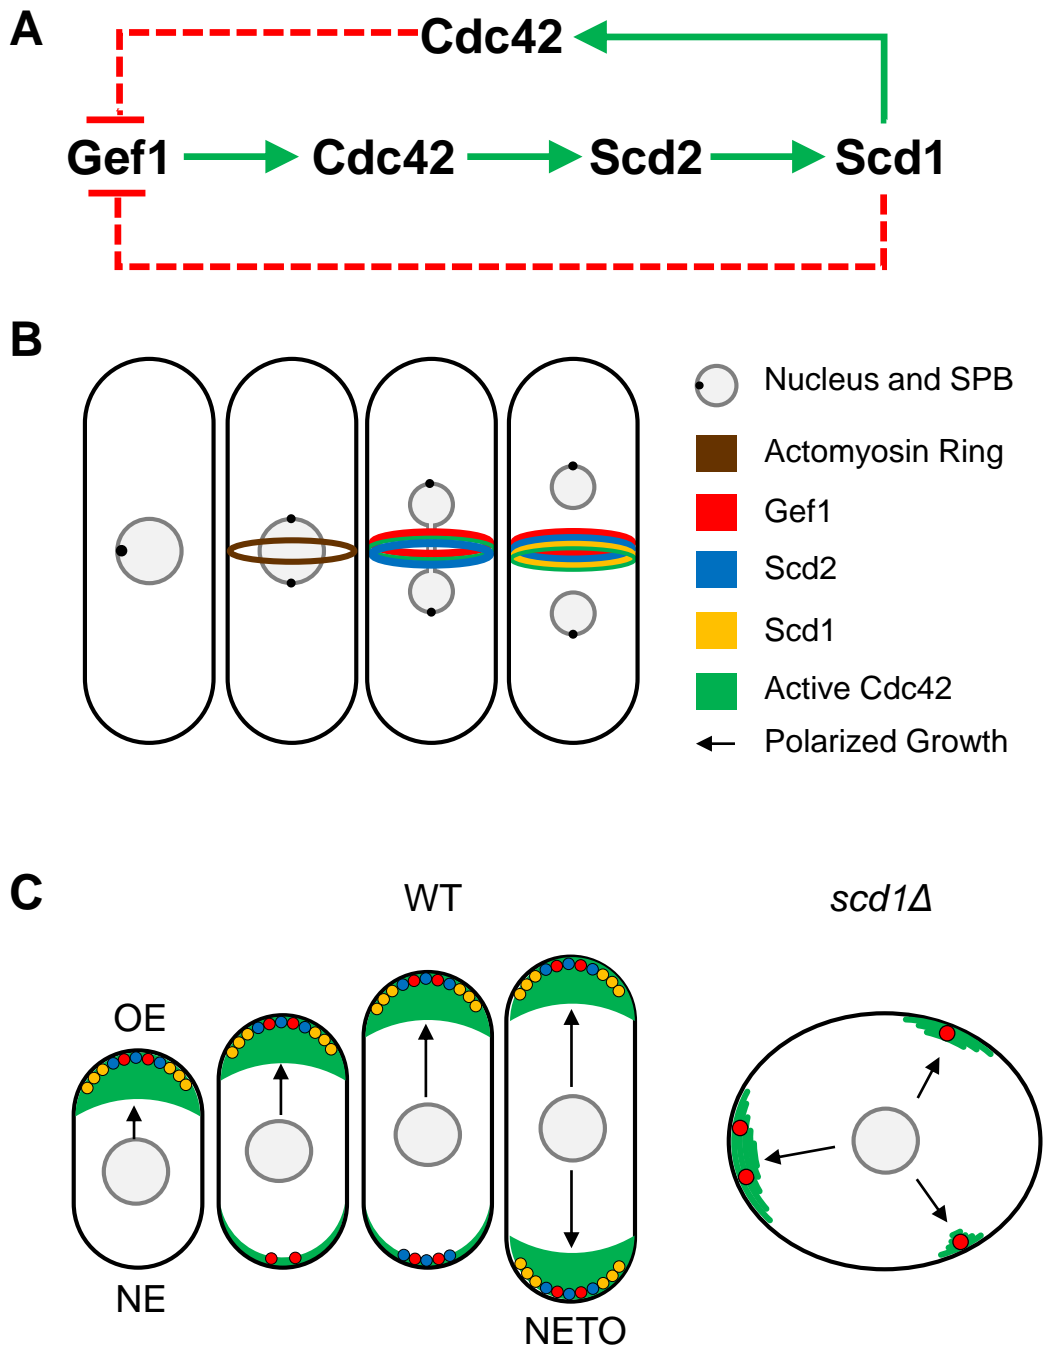

Figure 8
